# Supplementary material for: Atmospheric chemosynthesis may enable colonization of the driest place on Earth
Source: Research Square preprint supplement (doi:10.21203/rs.3.rs-5241557/v1), 2024-11-11
Supplement: Supplementary file 1 [file 26b58301f2cf42863e87b769.xlsx]

## Sheet: Summary
Metabolic marker gene abundance
Estimated abundance in community (%)				Carbon fixation						Trace gas metabolism								Phototrophy			Respiration
file_id	Site	Depth	Replicate	AclB	AcsB	HbsC	HbsT	Mcr	RbcL	CooS	CoxL	Fe	FeFe	NiFe	MmoA	PmoA	McrA	PsaA	PsbA	RHO	AtpA	CcoN	CoxA	CydA	CyoA	NuoF	SdhA	FrdA
TAL_IDNA_01_R1.tsv	TAL	0-1	R1	0.468509	0.17531	0.030707	1.14452	2.26955	4.68434	0.363559	23.7573	0.0594037	0.821237	16.5403	0.836506	0.0316767	0.233733	0.0491783	0.235667	0.990473	69.8991	1.66647	55.5052	22.8492	2.16652	54.7743	54.3057	19.6311
TAL_IDNA_01_R2.tsv	TAL	01	R2	0.311568	0.216383	0.0349216	1.9952	2.45733	3.99762	0.357005	22.1846	0.0911427	0.819557	17.4038	1.08899	0.102548	0.110341	0.0335053	0.390916	1.07247	65.7243	1.22095	47.3563	18.9658	0.809385	53.4552	53.3202	19.0563
TAL_IDNA_1020_R1.tsv	TAL	10-20	R1	2.59562	0.156113	0.0988623	1.53386	3.37417	22.2246	0.397397	27.9272	0.244557	3.15409	28.9309	0.286904	10.2206	0.270236	0.139816	0.485745	0.350812	96.5865	3.67803	148.063	25.1561	3.61406	98.549	94.2494	40.6231
TAL_IDNA_1020_R2.tsv	TAL	10-20	R2	1.68676	0.250268	0.143895	1.78873	3.27517	22.6647	0.388606	29.9746	0.249652	3.25074	30.2006	0.416754	12.8558	0.150622	0.199283	0.414609	0.727559	90.7841	2.95239	145.634	19.1242	4.57929	96.3405	94.4642	40.3265
TAL_IDNA_3040_R1.tsv	TAL	30-40	R1	1.33669	0.235611	0.181117	1.90927	4.62317	0	0	51.6527	0.128289	0	34.6636	0	2.89299	0.298319	0	1.39073	0.496502	92.5226	1.20152	145.958	34.6089	4.45948	0	0	41.1394
TAL_IDNA_3040_R2.tsv	TAL	30-40	R2	1.20412	0.21764	0.173568	2.00534	4.25099	24.4533	0.432201	54.423	0.27516	2.51888	38.2906	0.406819	1.99507	0.341379	0.074733	0.425411	0.587246	93.5815	1.75413	138.425	37.9391	6.60085	98.4688	0	42.2161
TAL_IDNA_5060_R1.tsv	TAL	50-60	R1	1.66494	0	0.0714798	1.98384	2.8471	18.18	0.499313	51.5549	0	2.36479	51.802	0.407959	0.669674	0.261601	0.0682727	0.252713	0.503056	104.239	19.9419	155.475	53.411	10.1529	82.1336	0	0
TAL_IDNA_5060_R2.tsv	TAL	50-60	R2	1.277	0.132176	0.175241	1.21288	2.99665	20.7858	0.339019	37.0322	0.136125	1.81525	36.3107	0.298247	1.11241	0.102224	0.24931	0.641502	0.347039	92.9675	20.3583	111.6	37.1155	14.259	87.8958	0	30.5929
TAL_IDNA_510_R1.tsv	TAL	5-10	R1	1.29496	0.180392	0.0946772	1.48742	2.5808	23.9545	0.359702	25.9611	0.259114	2.45005	25.8167	0.126043	6.34538	0.165493	0.0841366	0.284508	0.487311	75.3129	0.95244	111.607	16.8123	3.91204	75.9377	69.6282	29.2477
TAL_IDNA_510_R2.tsv	TAL	5-10	R2	1.68227	0.224548	0.135779	1.6251	3.1212	34.5555	0.512845	30.3002	0.217471	2.14698	29.5681	0.18719	5.58962	0.201269	0.138871	0.355599	0.573371	90.3316	14.5561	158.154	30.6961	6.29606	93.2874	89.8712	33.9672
DGA_IDNA_01_R1.tsv	DGA	0-1	R1	1.2856	0.210212	0.0878474	2.82548	3.94634	40.9191	0.557683	34.0044	0.38179	1.5539	58.9238	1.42816	0.196996	0.223034	0.0727986	0.508317	3.06683	77.152	0.178419	63.461	37.5279	2.55152	55.7051	60.1706	25.5784
DGA_IDNA_01_R2.tsv	DGA	0-1	R2	1.15505	0.177497	0.122824	4.35277	4.38326	28.0159	0.505056	53.817	0.276739	1.42767	56.6543	1.73391	0.0478239	0.309109	0.0863734	0.520401	2.64124	77.8278	0.187743	72.8021	52.4848	0.993082	55.633	68.6739	31.4594
DGA_IDNA_1020_R1.tsv	DGA	10-20	R1	1.0446	0.198919	0.119561	1.36799	2.72162	33.4149	0.273606	31.9733	0.142662	1.49971	37.9507	0.130576	0.311055	0	0.145096	0.571985	0.676452	92.5823	1.11649	127.095	24.8472	11.6214	85.5569	76.301	33.4324
DGA_IDNA_1020_R2.tsv	DGA	10-20	R2	1.0195	0.241621	0.0580483	1.38432	2.57887	49.3766	0.329747	30.7864	0.217218	1.99381	44.4492	0.173503	0.445323	0.0338264	0.138009	0.381855	0.943289	94.1593	0.874453	123.854	21.3325	7.15372	84.083	83.6782	35.0829
DGA_IDNA_3040_R1.tsv	DGA	30-40	R1	1.01267	0.132416	0.125778	2.55896	3.25146	6.00514	0.302478	43.5493	0	3.33107	32.998	0.313186	0.345412	0.371952	0.0684858	0.0203365	0.552788	77.6599	4.33267	144.485	46.6013	5.12848	64.3331	82.5199	31.9778
DGA_IDNA_3040_R2.tsv	DGA	30-40	R2	0	0	0	1.87121	0.999804	0	0	19.5712	0	1.5032	13.3226	0	0	0	1.4995	8.71147	1.44351	75.2285	5.20042	81.8136	39.7627	1.10761	20.1661	52.7219	20.6921
DGA_IDNA_5060_R1.tsv	DGA	50-60	R1	0.166582	0.168095	0.0524623	2.3624	2.30311	1.31276	0.884519	52.5833	0.0722052	0.61613	24.5151	0.0464411	0	0	0.5257	0.832628	0	111.611	23.249	146.527	67.9427	7.38494	68.799	50.4064	22.0409
DGA_IDNA_510_R1.tsv	DGA	5-10	R1	0.994374	0.257368	0.0632802	0	2.76772	34.6311	0.435093	17.3031	0.143257	1.81701	33.7227	0.144559	0.147628	0.115053	0.0171041	0.396566	0.76141	92.2687	1.79126	103.77	16.0266	4.77148	87.8896	73.0587	33.5125
DGA_IDNA_510_R2.tsv	DGA	5-10	R2	1.07377	0.162875	0.0876477	2.02944	3.15548	44.6208	0.436268	30.9587	0.377049	1.81814	43.6988	0.400327	0.0978651	0.288641	0.0827063	0.507441	1.47461	99.153	0.999034	103.751	22.7493	4.4227	73.8758	77.6735	35.1261
MES_IDNA_01_R2.tsv	MES	0-1	R2	0	0.0330663	0	0.865622	0.672075	1.14497	0.179213	6.54188	0	0.782769	3.21271	0	0.117586	0.0270079	0.0774062	0.132899	0.157774	67.431	91.6422	84.3172	81.9486	21.7287	58.2159	29.364	8.91762
MES_IDNA_1020_R1.tsv	MES	10-20	R1	0.189862	0	0	0.538642	0.7867	0.51065	0.419752	2.51559	0	0.749151	5.50353	0	0.213722	0	0.143085	0.161967	1.44695	82.187	111.57	81.2601	101.852	42.0894	11.9656	15.7459	5.76004
MES_IDNA_1020_R2.tsv	MES	10-20	R2	0.141421	0.187824	0	0.710757	1.06605	7.24462	0.157389	6.09933	0	0.8445	7.27476	0.025842	0.406089	0	0.147376	0.350209	0.0979563	106.139	155.512	137.162	129.743	46.6654	33.7412	37.6158	11.7619
MES_IDNA_3040_R1.tsv	MES	30-40	R1	0.171498	0.165766	0	0.457564	1.04614	1.98701	0.162016	9.17689	0.209802	2.85043	10.5167	0	0	0	0.159716	0.704314	0.124742	135.787	128.802	123.059	122.548	70.7322	26.8578	35.2767	15.8834
MES_IDNA_3040_R2.tsv	MES	30-40	R2	0.141153	0.205651	0	0.457536	1.21685	5.42969	0.999509	4.35011	0.430584	1.9225	3.62839	0.095407	0.951584	0.0301803	0.527331	0.450529	0.0577594	121.79	190.294	105.776	141.891	35.5131	30.0639	27.9674	12.9839
MES_IDNA_5060_R1.tsv	MES	50-60	R1	0.349668	0.117231	0.0260984	0.841179	1.35766	4.23825	0.189562	3.77017	0.211558	0.987504	4.45669	0.174794	0	0.0105783	0.313829	2.96352	0.17616	83.9402	152.86	117.465	95.9972	30.4725	21.2415	34.0331	12.6891
MES_IDNA_5060_R2.tsv	MES	50-60	R2	0.240945	1.09134	0.0407356	0.529068	1.35458	2.12696	0.19883	3.30829	0.437503	2.1149	3.73639	0.0385392	0.0377739	0	0.236268	0.821589	0.307479	139.133	116.299	123.676	112.216	19.1222	33.9897	27.1058	11.255
MES_IDNA_510_R1.tsv	MES	5-10	R1	0	0	0	0.975429	1.31224	12.3149	0.27496	16.5562	0	4.34412	9.54769	0.347591	0	0	0	20.9452	0	62.1157	62.8	80.6411	28.3322	5.42202	44.2565	44.8391	8.07721
MES_IDNA_510_R2.tsv	MES	5-10	R2	1.15755	0.124345	0.0616826	0.896225	1.36968	173.759	0.769844	17.8163	0.170028	2.32496	75.3741	0.774702	0.136794	0.148841	0	0.145535	0.0715408	58.2178	5.51312	147.084	10.9198	6.44342	119.314	72.8638	28.1212
NOA_IDNA_01_R1.tsv	NOA	0-1	R1	0.141267	0.158526	0.0703377	0.79773	1.39174	2.75696	0.299869	7.44014	0	0.732356	2.08911	0.30181	0	0.0618073	0.0171152	1.171	0.361038	80.4911	110.55	94.5947	94.962	11.8561	21.7959	32.5032	11.5475
NOA_IDNA_01_R2.tsv	NOA	0-1	R2	0.157555	0.176245	0.0394037	0.4372	0.870265	1.62885	0.118696	4.74382	0.0537171	7.4926	1.23624	0.0729066	0.071861	0.0659692	0.0505428	0.12724	0.565303	82.8572	109.707	102.748	98.3441	17.4646	25.2685	28.5205	10.886
NOA_IDNA_1020_R1.tsv	NOA	10-20	R1	0.0867357	0.158444	0	0.429162	0.969764	2.03122	0.213424	3.2284	0.106889	1.14247	4.2354	0.0473965	0	0	0.112861	0.108498	0.0455976	138.186	113.953	121.159	107.708	24.3523	21.8977	26.2783	13.4871
NOA_IDNA_1020_R2.tsv	NOA	10-20	R2	0.398783	0.267663	0	1.25642	0.953191	6.7414	0.147216	11.9995	0	2.41673	7.65873	0.143578	0	0	0.126406	1.96874	0.51177	96.4625	14.4422	82.6961	46.2591	9.23332	25.8649	27.5514	10.0552
NOA_IDNA_3040_R1.tsv	NOA	30-40	R1	1.82931	0.617516	0	2.90026	1.85589	14.1575	0.0925817	16.9971	0.991487	2.22554	15.5552	0	2.68423	0	1.26442	6.78453	0.891873	142.949	62.9897	229.332	114.292	18.5187	47.0386	57.4597	23.1029
NOA_IDNA_3040_R2.tsv	NOA	30-40	R2	0.64254	0.366624	0.041856	0.883305	0.969599	1.11997	0.218434	2.70773	0.085416	1.48169	2.92341	0.364684	0.154195	0.0527993	0.579075	0.889739	0.992392	88.1715	166.484	132.901	109.422	19.343	37.1711	25.802	12.3561
NOA_IDNA_5060_R1.tsv	NOA	50-60	R1	0.247992	0.189081	0.0110133	0.901336	0.998063	2.66088	0.222294	5.36853	0.155063	1.26653	4.73477	0.104173	0	0	0.0817381	1.18902	0.222631	93.8681	126.879	121.963	86.4279	22.2884	32.0106	25.6468	10.4411
NOA_IDNA_5060_R2.tsv	NOA	50-60	R2	0	0	0	0.602018	1.4307	6.51078	0.209659	6.98918	0.224723	1.20422	3.59795	0.272328	0.145993	0	0.339359	1.06373	1.26957	148.836	151.004	193.95	168.864	27.5985	32.3087	33.6116	11.7802
NOA_IDNA_510_R1.tsv	NOA	5-10	R1	0	0	0	0	0	0	0	0	0	0	0	0	0	0	0	0	0	0	0	0	0	0	0	0	0
NOA_IDNA_510_R2.tsv	NOA	5-10	R2	0.270141	0.184972	0.089099	1.75177	2.49894	3.14681	0.142683	20.3	0.168721	0.870426	29.2888	1.01377	0.0740704	0.0621276	0.0606604	0.592467	0.513531	82.3634	40.3402	70.9769	30.189	11.4847	66.2916	60.4265	22.5993
YUN_IDNA_01_R1.tsv	YUN	0-1	R1	0.121211	1.26514	0.569245	0.358855	1.15479	3.39505	0.638503	4.79586	0	0.937009	1.14807	0.051271	0.422161	0.21702	0.506623	0.758467	0.478266	137.211	71.4809	166.083	142.731	18.1014	53.2293	30.5874	8.19425
YUN_IDNA_01_R2.tsv	YUN	0-1	R2	0	0	0	0.201592	1.08645	0	0.217846	0.169444	0	0.664775	12.4863	0	0	0	0	0	0	75.9546	145.637	179.339	171.6	0	24.6031	20.0872	4.93628
YUN_IDNA_1020_R1.tsv	YUN	10-20	R1	0.0625895	0.150426	0	0.795084	1.79921	1.10761	0.205585	9.86514	0.0407302	1.59858	8.40207	0.213792	0	0.134474	0.102591	0.713059	0.203458	123.501	142.467	141.458	112.173	32.5561	35.3436	35.0064	14.5081
YUN_IDNA_1020_R2.tsv	YUN	10-20	R2	0.338692	0.276587	0.0565052	1.30257	1.3665	4.21318	0.420368	8.19938	0.0249479	0.803394	7.49139	0.218963	0.0657819	0	0.162638	1.03326	0.64792	102.994	162.056	137.072	115.546	21.2428	40.0021	29.397	12.5444
YUN_IDNA_3040_R1.tsv	YUN	30-40	R1	0.432243	0.0794558	0.0140203	0.612261	1.34267	3.77017	0.293887	3.15789	0.0566373	1.08784	3.10825	0.0251068	0.201893	0.137943	0.338253	2.40528	0.215157	111.985	141.386	128.615	138.041	25.6007	35.7736	25.2483	11.061
YUN_IDNA_3040_R2.tsv	YUN	30-40	R2	0	0	0	0	0	0	0	0	0	0	0	0	0	0	0	0	0	53.1032	21.0137	6.58301	24.5893	23.1651	3.5534	8.95879	0.680191
YUN_IDNA_5060_R1.tsv	YUN	50-60	R1	0.978445	0.20776	0.185087	1.18278	0.65442	0.0889385	0.449795	6.84665	0	1.96291	3.53616	0	0	0.234861	0	0.375819	1.5999	146.936	142.944	104.581	115.353	20.6208	35.248	37.8966	17.4733
YUN_IDNA_5060_R2.tsv	YUN	50-60	R2	0	0.937439	0.231396	0.405141	1.01323	5.37787	0.207316	2.76276	0.0816475	0.567587	2.15521	0.0527865	0	0	0.174316	0.467724	0.177694	64.0983	146.477	115.781	125.021	12.5385	25.3939	26.5582	9.89451
YUN_IDNA_510_R1.tsv	YUN	5-10	R1	0.789033	0	0	5.14083	0.57776	18.803	0	10.8743	0.12517	0.20338	10.5725	0	0	0	0	0.354449	0	55.6574	18.617	37.3347	10.404	35.8089	40.1896	21.5815	6.38033
YUN_IDNA_510_R2.tsv	YUN	5-10	R2	0.292661	0.107306	0	1.32456	1.49655	12.0316	0.188011	16.7629	0	1.31905	11.5089	0.467353	0	0	0.4802	0.556092	0.742921	105.246	101.389	85.3804	73.3629	13.1386	35.1991	38.4445	16.4
			Mean (max abundance capped at 100%)	0.641771	0.219118	0.0700889	1.31211	1.89402	14.895	0.31539	18.4233	0.145669	1.66981	19.1326	0.271607	1.0445	0.0991584	0.195627	1.36185	0.613456	92.8584	64.8192	100	69.5144	15.5226	49.0565	41.6803	19.0017

## Sheet: McrA
file_id	McrA-like	Oxidative	Reductive	NA	SUM
TAL_IDNA_01_R1.tsv	0.0140297	0.0209312	0.193433	0.00533913	0.233733
TAL_IDNA_01_R2.tsv	0.024763	0	0.0855781	0	0.110341
TAL_IDNA_1020_R1.tsv	0.00809293	0.00809713	0.254046	0	0.270236
TAL_IDNA_1020_R2.tsv	0.0303029	0	0.12032	0	0.150622
TAL_IDNA_3040_R1.tsv	0.0349637	0	0.263355	0	0.298319
TAL_IDNA_3040_R2.tsv	0.00798932	0	0.33339	0	0.341379
TAL_IDNA_5060_R1.tsv	0	0	0.261601	0	0.261601
TAL_IDNA_5060_R2.tsv	0.0166358	0	0.0760596	0.00952834	0.102224
TAL_IDNA_510_R1.tsv	0.0221871	0	0.143306	0	0.165493
TAL_IDNA_510_R2.tsv	0.00995022	0.00995538	0.181364	0	0.201269
DGA_IDNA_01_R1.tsv	0.00661378	0	0.216421	0	0.223034
DGA_IDNA_01_R2.tsv	0.0248974	0	0.284212	0	0.309109
DGA_IDNA_1020_R2.tsv	0.0126575	0.00708154	0.0140873	0	0.0338264
DGA_IDNA_3040_R1.tsv	0	0	0.346914	0.0250381	0.371952
DGA_IDNA_510_R1.tsv	0.0514172	0	0.0636362	0	0.115053
DGA_IDNA_510_R2.tsv	0.00660414	0.0136917	0.268346	0	0.288641
MES_IDNA_01_R2.tsv	0	0	0.0270079	0	0.0270079
MES_IDNA_3040_R2.tsv	0	0	0.0301803	0	0.0301803
MES_IDNA_5060_R1.tsv	0.0105783	0	0	0	0.0105783
MES_IDNA_510_R2.tsv	0.0463433	0	0.102497	0	0.148841
NOA_IDNA_01_R1.tsv	0	0	0.0618073	0	0.0618073
NOA_IDNA_01_R2.tsv	0.0101627	0	0.0558064	0	0.0659692
NOA_IDNA_3040_R2.tsv	0	0	0.0527993	0	0.0527993
NOA_IDNA_510_R2.tsv	0.0504427	0	0.0116849	0	0.0621276
YUN_IDNA_01_R1.tsv	0.21702	0	0	0	0.21702
YUN_IDNA_1020_R1.tsv	0.134474	0	0	0	0.134474
YUN_IDNA_3040_R1.tsv	0	0	0.137943	0	0.137943
YUN_IDNA_5060_R1.tsv	0	0	0.234861	0	0.234861

## Sheet: PmoA
file_id	Alphaproteobacteria	Gammaproteobacteria	Methylomirabilota	PxmA	Verrucomicrobia)	SUM
TAL_IDNA_01_R1.tsv	0.00940285	0.0222739	0	0	0	0.0316767
TAL_IDNA_01_R2.tsv	0.0367278	0.0438022	0.0114802	0.0105373	0	0.102548
TAL_IDNA_1020_R1.tsv	1.13096	8.13474	0.0377409	0.71404	0.203148	10.2206
TAL_IDNA_1020_R2.tsv	0.425763	11.9389	0.114332	0.147998	0.228765	12.8558
TAL_IDNA_3040_R1.tsv	0.3142	0.935472	0.450379	0.685835	0.507107	2.89299
TAL_IDNA_3040_R2.tsv	0.0729393	1.26566	0	0.623578	0.0328982	1.99507
TAL_IDNA_5060_R1.tsv	0.0844579	0.0834187	0.135429	0.366369	0	0.669674
TAL_IDNA_5060_R2.tsv	0.0175087	1.05702	0	0.0378845	0	1.11241
TAL_IDNA_510_R1.tsv	0.354973	4.88743	0.0659972	0.908561	0.128419	6.34538
TAL_IDNA_510_R2.tsv	0.328749	4.67313	0.185609	0.256949	0.145183	5.58962
DGA_IDNA_01_R1.tsv	0.0565654	0.0723454	0	0	0.0680851	0.196996
DGA_IDNA_01_R2.tsv	0.0340954	0	0	0	0.0137284	0.0478239
DGA_IDNA_1020_R1.tsv	0.0513452	0.0758767	0	0.119937	0.0638962	0.311055
DGA_IDNA_1020_R2.tsv	0.0734373	0.24087	0.0477876	0.0303869	0.0528414	0.445323
DGA_IDNA_3040_R1.tsv	0	0	0	0	0.345412	0.345412
DGA_IDNA_510_R1.tsv	0.0465255	0.0648779	0	0.0122259	0.0239984	0.147628
DGA_IDNA_510_R2.tsv	0.023909	0.0294776	0	0.0285192	0.0159593	0.0978651
MES_IDNA_01_R2.tsv	0	0.117586	0	0	0	0.117586
MES_IDNA_1020_R1.tsv	0	0.213722	0	0	0	0.213722
MES_IDNA_1020_R2.tsv	0	0	0	0.406089	0	0.406089
MES_IDNA_3040_R2.tsv	0	0.703271	0	0.248314	0	0.951584
MES_IDNA_5060_R2.tsv	0	0.0377739	0	0	0	0.0377739
MES_IDNA_510_R2.tsv	0.0553722	0	0	0.0533486	0.0280733	0.136794
NOA_IDNA_01_R2.tsv	0	0.0487952	0	0.0230658	0	0.071861
NOA_IDNA_3040_R1.tsv	2.68423	0	0	0	0	2.68423
NOA_IDNA_3040_R2.tsv	0.0377907	0.116404	0	0	0	0.154195
NOA_IDNA_5060_R2.tsv	0.0959465	0	0	0	0.0500469	0.145993
NOA_IDNA_510_R2.tsv	0.0119647	0.0621057	0	0	0	0.0740704
YUN_IDNA_01_R1.tsv	0	0.422161	0	0	0	0.422161
YUN_IDNA_1020_R2.tsv	0	0	0	0.0657819	0	0.0657819
YUN_IDNA_3040_R1.tsv	0.201893	0	0	0	0	0.201893

## Sheet: MmoA
file_id	bryophila	buryatense	capsulatus	hirsuta	ishizawai	marinum	methanicus	Methylomonas	Methylosinus	silvestris	sp. LW4	sp. MK1	sp. PW1	sporium	stellata	tundripaludum	aerolata	miyakonense	methanica	polyspora	SUM
TAL_IDNA_01_R1.tsv	0.233475	0.0169579	0.106595	0.0499446	0.00559088	0.0790451	0.00552418	0.00559732	0.0447014	0.0548058	0.0557805	0.0393398	0.0555892	0.0555892	0.0167823	0.0111882	0	0	0	0	0.836506
TAL_IDNA_01_R2.tsv	0.265988	0.0275992	0.0986119	0.0650283	0.0218382	0.110269	0.0107888	0.0273291	0.054564	0.0535182	0.0653641	0.0658553	0.0651399	0.0915487	0.0273134	0.0273134	0.00540668	0.00551024	0	0	1.08899
TAL_IDNA_1020_R1.tsv	0.0445597	0	0	0.02669	0.00896318	0	0.0177125	0	0	0	0	0	0	0.0176823	0	0.00896834	0.0177528	0	0.144575	0	0.286904
TAL_IDNA_1020_R2.tsv	0.0327112	0.0221752	0.0110044	0.0217701	0.0219329	0.0221494	0.0325068	0.0109791	0.0109601	0.0107501	0.0109413	0.0110235	0.0109037	0.0327112	0.0109728	0.0219455	0.0217206	0.0110683	0.0773881	0.0111394	0.416754
TAL_IDNA_3040_R2.tsv	0.0603699	0.0175394	0.0435195	0.034438	0.00867386	0.0262785	0	0.0173677	0.0260066	0.0170055	0.0346158	0.017438	0.0258728	0.0517456	0	0.0173577	0.00858989	0	0	0	0.406819
TAL_IDNA_5060_R1.tsv	0.0213197	0.0433583	0.0215165	0	0.0214423	0.043308	0.0211865	0.021467	0	0.0210193	0	0.0215539	0	0.0211504	0.0214546	0.0429093	0.0212347	0.0216414	0.0216163	0.0217805	0.407959
TAL_IDNA_5060_R2.tsv	0.148809	0	0.0300365	0.0198072	0	0	0	0	0.0199438	0	0.0199095	0.0200591	0.0198412	0.0198412	0	0	0	0	0	0	0.298247
TAL_IDNA_510_R1.tsv	0	0	0.00786406	0	0	0	0	0	0.0156648	0	0	0.0078777	0	0.00773024	0	0	0	0	0.0869059	0	0.126043
TAL_IDNA_510_R2.tsv	0.0109572	0.0111419	0.0110583	0.0109384	0	0.011129	0.0217774	0	0	0.0108028	0	0	0	0.0108702	0.0110265	0.0110265	0.0109135	0	0.0555482	0	0.18719
DGA_IDNA_01_R1.tsv	0.24274	0.101637	0.187338	0.0356359	0.093346	0.101519	0.0212843	0.100642	0.0358817	0.0211164	0.0358199	0.0649603	0.035697	0.134571	0.0215538	0.0933997	0.0284438	0.0217414	0.0289549	0.0218811	1.42816
DGA_IDNA_01_R2.tsv	0.248603	0.068323	0.169526	0.0737826	0.0675765	0.129663	0.0667702	0.0676543	0.0742914	0.0794919	0.0674214	0.101892	0.0671901	0.139979	0.121708	0.0540923	0.0334611	0.034102	0.0340625	0.0343211	1.73391
DGA_IDNA_1020_R1.tsv	0.00624714	0	0.0189145	0	0	0	0.0124162	0	0	0.0554319	0	0	0	0.00619753	0.0251467	0	0.00622224	0	0	0	0.130576
DGA_IDNA_1020_R2.tsv	0.0300915	0.00764972	0.022777	0.00750999	0.00756614	0.00764083	0.00747586	0	0.00756179	0.00741686	0.00754877	0.015211	0.00752288	0.0223894	0	0.015141	0	0	0	0	0.173503
DGA_IDNA_3040_R1.tsv	0.0521377	0	0	0.0520484	0	0	0	0	0.0524074	0	0.0523171	0	0.0521377	0.0521377	0	0	0	0	0	0	0.313186
DGA_IDNA_5060_R1.tsv	0	0	0	0	0	0	0.0464411	0	0	0	0	0	0	0	0	0	0	0	0	0	0.0464411
DGA_IDNA_510_R1.tsv	0.0377471	0	0	0.0125608	0	0	0.0187556	0	0.0126475	0.0124051	0.0126257	0	0.0125824	0.0125824	0	0	0.00626611	0.00638612	0	0	0.144559
DGA_IDNA_510_R2.tsv	0.0581799	0.0073951	0.00733963	0.0363002	0.00731431	0.0295461	0.0433622	0.00732273	0.0219303	0.02868	0.0364876	0	0.0290899	0.0581799	0.014637	0.00731851	0.0072435	0	0	0	0.400327
MES_IDNA_1020_R2.tsv	0	0	0	0	0	0	0.025842	0	0	0	0	0	0	0	0	0	0	0	0	0	0.025842
MES_IDNA_3040_R2.tsv	0.095407	0	0	0	0	0	0	0	0	0	0	0	0	0	0	0	0	0	0	0	0.095407
MES_IDNA_5060_R1.tsv	0.0115944	0	0.0117015	0.0115746	0.0116611	0	0	0	0.0116544	0.011431	0.0116343	0.0117218	0.0115944	0.0231889	0	0.0116678	0	0.0117694	0.0117557	0.011845	0.174794
MES_IDNA_5060_R2.tsv	0.0193081	0	0	0	0	0	0	0	0	0	0	0	0	0	0	0	0.0192311	0	0	0	0.0385392
MES_IDNA_510_R1.tsv	0.347591	0	0	0	0	0	0	0	0	0	0	0	0	0	0	0	0	0	0	0	0.347591
MES_IDNA_510_R2.tsv	0.0964027	0	0	0.0412447	0.041553	0.0419633	0.054743	0	0.0415292	0.0407332	0.0414577	0.0556923	0.0413155	0.0826309	0.0554359	0	0	0.0419389	0.0558537	0.0422084	0.774702
NOA_IDNA_01_R1.tsv	0.117487	0	0.131746	0	0	0	0	0.0525771	0	0	0	0	0	0	0	0	0	0	0	0	0.30181
NOA_IDNA_01_R2.tsv	0.0241605	0	0.0243835	0	0.0121497	0	0	0	0	0	0	0.0122129	0	0	0	0	0	0	0	0	0.0729066
NOA_IDNA_1020_R1.tsv	0.0473965	0	0	0	0	0	0	0	0	0	0	0	0	0	0	0	0	0	0	0	0.0473965
NOA_IDNA_1020_R2.tsv	0	0	0	0	0	0	0	0.0476843	0	0	0	0.0478772	0	0	0	0	0	0	0.048016	0	0.143578
NOA_IDNA_3040_R2.tsv	0.095395	0	0	0.0380927	0	0	0	0	0	0	0.0382894	0.0192885	0.038158	0	0	0.0383995	0	0.0387338	0.0193444	0.0389827	0.364684
NOA_IDNA_5060_R1.tsv	0.0417611	0	0	0.0104224	0	0	0.0207501	0	0	0.0102932	0	0	0	0.0104403	0.0105064	0	0	0	0	0	0.104173
NOA_IDNA_5060_R2.tsv	0	0.0747211	0	0	0	0	0	0.0739899	0	0	0	0	0	0	0	0.0739473	0	0	0.0496697	0	0.272328
NOA_IDNA_510_R2.tsv	0.270297	0.0249867	0.0929973	0.0306629	0.0741412	0.0249577	0.00610471	0.105154	0.0308744	0	0.0308213	0.086948	0.0307155	0.0368586	0	0.0247279	0	0.0249432	0.0872001	0.0313794	1.01377
YUN_IDNA_01_R1.tsv	0	0	0	0	0	0	0.051271	0	0	0	0	0	0	0	0	0	0	0	0	0	0.051271
YUN_IDNA_1020_R1.tsv	0.159847	0	0	0	0	0	0	0	0	0	0	0.0269337	0	0	0	0	0	0	0.0270118	0	0.213792
YUN_IDNA_1020_R2.tsv	0.0670983	0.0341148	0	0.0167459	0	0	0	0	0.0168613	0	0.0168323	0	0.0167746	0.0167746	0	0.0337615	0	0	0	0	0.218963
YUN_IDNA_3040_R1.tsv	0.0251068	0	0	0	0	0	0	0	0	0	0	0	0	0	0	0	0	0	0	0	0.0251068
YUN_IDNA_5060_R2.tsv	0	0	0	0	0	0	0	0.0527865	0	0	0	0	0	0	0	0	0	0	0	0	0.0527865
YUN_IDNA_510_R2.tsv	0	0	0.0622476	0.0307863	0	0.0626453	0	0.0621043	0	0	0	0.0623556	0	0	0	0.0620686	0	0.0626089	0.0625363	0	0.467353

## Sheet: FeFe
file_id	[FeFe] Group A1	[FeFe] Group A2	[FeFe] Group A3	[FeFe] Group A4	[FeFe] Group C2	[FeFe] Group C3	[FeFe] Group B	[FeFe] Group C1	SUM
TAL_IDNA_01_R1.tsv	0.0593441	0.160194	0.11728	0.0390464	0.339031	0.10634	0	0	0.821237
TAL_IDNA_01_R2.tsv	0.05795	0.0824553	0.062709	0.0114802	0.459221	0.0840189	0.0319131	0.0298089	0.819557
TAL_IDNA_1020_R1.tsv	0.218695	0.059191	0.347665	0	2.12151	0.223469	0.133679	0.0498783	3.15409
TAL_IDNA_1020_R2.tsv	0.316222	0.116711	0.541194	0.0461201	1.97357	0.133361	0.0654225	0.0581422	3.25074
TAL_IDNA_3040_R2.tsv	0.115438	0.0543236	0.658422	0	1.15377	0.183949	0.352976	0	2.51888
TAL_IDNA_5060_R1.tsv	0.0982561	0.288311	0.298704	0	1.55193	0.0656482	0.0619405	0	2.36479
TAL_IDNA_5060_R2.tsv	0.182884	0.156518	0.371147	0	0.800219	0.0854734	0.190373	0.0286322	1.81525
TAL_IDNA_510_R1.tsv	0.153344	0.0173832	0.412439	0	1.47169	0.191053	0.140258	0.0638832	2.45005
TAL_IDNA_510_R2.tsv	0.231202	0.0480906	0.296735	0	1.35809	0.0317287	0.151375	0.0297579	2.14698
DGA_IDNA_01_R1.tsv	0.0568875	0.0641172	0.240131	0.0164734	0.68825	0.208114	0.112697	0.167234	1.5539
DGA_IDNA_01_R2.tsv	0.0863027	0.0153015	0.36632	0	0.56841	0.102365	0.288973	0	1.42767
DGA_IDNA_1020_R1.tsv	0.041863	0.0284538	0.241857	0.0292537	0.860335	0.097036	0.16639	0.0345221	1.49971
DGA_IDNA_1020_R2.tsv	0.205319	0.0835928	0.0939822	0.0318199	1.13963	0.117129	0.262712	0.0596262	1.99381
DGA_IDNA_3040_R1.tsv	0	0	1.32067	0	1.43604	0.347518	0.226838	0	3.33107
DGA_IDNA_3040_R2.tsv	0.756279	0	0	0	0.746921	0	0	0	1.5032
DGA_IDNA_5060_R1.tsv	0	0	0.106705	0	0.367767	0.141657	0	0	0.61613
DGA_IDNA_510_R1.tsv	0.110665	0.071636	0.515549	0.01444	0.69312	0.268373	0.110033	0.0331924	1.81701
DGA_IDNA_510_R2.tsv	0.194093	0.062658	0.3218	0.0167804	0.801233	0.155117	0.226767	0.0396867	1.81814
MES_IDNA_01_R2.tsv	0	0.0653675	0	0	0.629263	0.0881385	0	0	0.782769
MES_IDNA_1020_R1.tsv	0	0.121687	0	0	0.627464	0	0	0	0.749151
MES_IDNA_1020_R2.tsv	0	0	0	0	0.767412	0	0.077088	0	0.8445
MES_IDNA_3040_R1.tsv	0	0	0.479355	0	2.37107	0	0	0	2.85043
MES_IDNA_3040_R2.tsv	0	0	0.0728995	0	1.06364	0	0.0960662	0.689889	1.9225
MES_IDNA_5060_R1.tsv	0	0	0.0528779	0	0.866804	0.0678216	0	0	0.987504
MES_IDNA_5060_R2.tsv	0.132085	0	0.122207	0.0816683	1.40549	0	0.373442	0	2.1149
MES_IDNA_510_R1.tsv	2.97643	0	0	0	1.36769	0	0	0	4.34412
MES_IDNA_510_R2.tsv	0.0346076	0	0.0332233	0	0.270944	1.79917	0	0.18701	2.32496
NOA_IDNA_01_R1.tsv	0.0620425	0	0.0849812	0	0.513647	0	0.0716848	0	0.732356
NOA_IDNA_01_R2.tsv	0.0577276	3.66002	2.28796	0.0289033	0.308963	0.109853	0.939036	0.100134	7.4926
NOA_IDNA_1020_R1.tsv	0	0	0.27706	0	0.652728	0.0702512	0.142434	0	1.14247
NOA_IDNA_1020_R2.tsv	0	0	0.226615	0	2.04973	0	0.140386	0	2.41673
NOA_IDNA_3040_R1.tsv	0	0	0.255389	0	1.97015	0	0	0	2.22554
NOA_IDNA_3040_R2.tsv	0.213222	0	0.183599	0	0.825784	0	0.209869	0.0492171	1.48169
NOA_IDNA_5060_R1.tsv	0	0.0243467	0	0	0.84214	0.0618985	0.338149	0	1.26653
NOA_IDNA_5060_R2.tsv	0	0	0.168662	0	0.481891	0	0.553669	0	1.20422
NOA_IDNA_510_R1.tsv	0	0	0	0	0	0	0	0	0
NOA_IDNA_510_R2.tsv	0.171817	0	0.0696777	0	0.483433	0.0478233	0.0976754	0	0.870426
YUN_IDNA_01_R1.tsv	0.186826	0	0	0.246886	0.203008	0	0.300289	0	0.937009
YUN_IDNA_01_R2.tsv	0	0	0.664775	0	0	0	0	0	0.664775
YUN_IDNA_1020_R1.tsv	0.228129	0	0.060123	0	1.31033	0	0	0	1.59858
YUN_IDNA_1020_R2.tsv	0.0298461	0	0.146511	0	0.627037	0	0	0	0.803394
YUN_IDNA_3040_R1.tsv	0	0.0277221	0.111451	0	0.642129	0.306539	0	0	1.08784
YUN_IDNA_5060_R1.tsv	0.183436	0	0	0	1.77947	0	0	0	1.96291
YUN_IDNA_5060_R2.tsv	0.121283	0	0.240027	0	0.206277	0	0	0	0.567587
YUN_IDNA_510_R1.tsv	0	0	0.20338	0	0	0	0	0	0.20338
YUN_IDNA_510_R2.tsv	0.287208	0	0	0	0.606722	0.2589	0	0.166218	1.31905

## Sheet: Fe
file_id	Methanobacterium formicicum	Methanobrevibacter ruminantium	Methanopyrus kandleri	Methanothermobacter marburgensis	Methanothermobacter thermautotrophicus	Methanobrevibacter smithii	Methanocaldococcus villosus	Methanococcus aeolicus	Methanococcus voltae	Methanothermococcus okinawensis	Methanotorris igneus	Methanobrevibacter sp. AbM4	Methanocaldococcus infernus	Methanocaldococcus jannaschii	Methanococcus vannielii	Methanocorpusculum labreanum	Methanoregula formicica	Methanocaldococcus fervens	Methanococcus maripaludis	Methanoplanus petrolearius	Methanothermococcus thermolithotrophicus	Methanocaldococcus sp. FS406-22	Methanocaldococcus vulcanius	Methanothermus fervidus	Methanotorris formicicus	SUM
TAL_IDNA_01_R1.tsv	0.00841779	0.00851361	0.0165914	0.0172845	0.00859642	0	0	0	0	0	0	0	0	0	0	0	0	0	0	0	0	0	0	0	0	0.0594037
TAL_IDNA_01_R2.tsv	0.00822003	0.00831361	0	0	0.00839446	0.00845426	0.00848448	0.0248321	0.00837226	0.00805954	0.00801193	0	0	0	0	0	0	0	0	0	0	0	0	0	0	0.0911427
TAL_IDNA_1020_R1.tsv	0.0134952	0.0272977	0	0	0	0.0277595	0	0.0135893	0	0	0	0.0137573	0.013625	0.0263739	0.0131758	0.0817499	0.013733	0	0	0	0	0	0	0	0	0.244557
TAL_IDNA_1020_R2.tsv	0	0.0166993	0	0	0	0.0339638	0	0.0166265	0.0168172	0.016189	0	0.016832	0.0166701	0.0161342	0	0.0166701	0	0.0166993	0.0162165	0.0336937	0.0164402	0	0	0	0	0.249652
TAL_IDNA_3040_R1.tsv	0	0	0.0476126	0	0	0	0	0.0324336	0	0.01579	0	0.0164172	0	0	0	0	0	0	0	0	0.0160351	0	0	0	0	0.128289
TAL_IDNA_3040_R2.tsv	0.0391788	0.0132083	0.0257403	0.0134079	0.0133367	0	0.0134798	0.0263014	0	0.0128046	0	0.0133132	0	0.0127613	0.0127505	0	0	0	0	0.013325	0.0260066	0.0132547	0.0128592	0.0134317	0	0.27516
TAL_IDNA_5060_R2.tsv	0	0.0151936	0.0148047	0	0	0.0154507	0	0	0	0.0147293	0	0	0.015167	0	0	0	0	0	0	0.0153278	0.0149578	0.030494	0	0	0	0.136125
TAL_IDNA_510_R1.tsv	0.0117995	0.0119338	0	0.0121141	0.0120499	0.0121357	0	0.0118818	0.024036	0.0115691	0.0230015	0.0120286	0.011913	0.01153	0.0115202	0	0	0	0.0463552	0	0.0352459	0	0	0	0	0.259114
TAL_IDNA_510_R2.tsv	0.0331846	0	0	0.0170348	0.0169444	0.0170651	0	0	0	0.0162683	0.0161722	0.0507435	0	0	0.0161996	0	0	0	0	0.0338589	0	0	0	0	0	0.217471
DGA_IDNA_01_R1.tsv	0	0.0328025	0	0.0665964	0.0662431	0	0.0111589	0.0108865	0.0110113	0.0106	0	0.022042	0	0.0316924	0.0316656	0.010915	0.0440064	0.0109342	0.0212361	0	0	0	0	0	0	0.38179
DGA_IDNA_01_R2.tsv	0	0.0205806	0.0200538	0.0417833	0.0103904	0.0104644	0.0105018	0.0307364	0.0207258	0	0	0	0	0.0298263	0.00993369	0	0	0.0102903	0	0	0.0202613	0.0103265	0.0100184	0.0104644	0.0103812	0.276739
DGA_IDNA_1020_R1.tsv	0.00945996	0	0.00932274	0.00971222	0	0.00972952	0.0097643	0	0.0192703	0	0	0.00964365	0	0.00924387	0	0	0	0	0	0	0.0565151	0	0	0	0	0.142662
DGA_IDNA_1020_R2.tsv	0.0227836	0	0.0224531	0	0	0.0351492	0	0	0.0116027	0	0	0.023226	0.0230026	0.0111316	0.0222443	0.0115013	0.0115925	0	0.0111884	0	0.0113427	0	0	0	0	0.217218
DGA_IDNA_5060_R1.tsv	0	0	0	0	0	0	0	0	0	0	0	0	0	0	0	0	0	0	0	0.0722052	0	0	0	0	0	0.0722052
DGA_IDNA_510_R1.tsv	0.00952665	0	0.0281654	0.0097807	0	0.00979812	0	0.0287793	0.00970307	0	0.00928547	0.0194233	0	0.00930904	0	0	0	0	0	0	0.00948559	0	0	0	0	0.143257
DGA_IDNA_510_R2.tsv	0.0110126	0.033414	0.0108529	0.0339189	0.0112463	0.0113264	0	0.0332683	0	0.0215952	0	0.0112265	0.0111185	0.0322832	0.010752	0	0	0.022276	0	0.0112364	0.0328955	0.0223543	0	0.0113264	0.0449455	0.377049
MES_IDNA_3040_R1.tsv	0	0	0	0	0	0	0	0	0	0	0	0	0	0.209802	0	0	0	0	0	0	0	0	0	0	0	0.209802
MES_IDNA_3040_R2.tsv	0	0	0	0	0	0	0	0	0	0.283305	0	0.147279	0	0	0	0	0	0	0	0	0	0	0	0	0	0.430584
MES_IDNA_5060_R1.tsv	0	0	0	0	0	0	0	0	0	0	0	0.089491	0	0.0343125	0	0.0531783	0	0	0	0	0	0	0.0345757	0	0	0.211558
MES_IDNA_5060_R2.tsv	0	0.0591416	0	0.0300176	0.0298584	0	0	0	0	0.0286671	0	0	0	0.0857103	0	0	0	0	0.0287159	0	0	0.0890242	0.0863679	0	0	0.437503
MES_IDNA_510_R2.tsv	0	0	0	0	0.021297	0.0428974	0	0.0209999	0	0	0	0.0637782	0	0	0	0.021055	0	0	0	0	0	0	0	0	0	0.170028
NOA_IDNA_01_R2.tsv	0	0	0	0	0	0	0	0	0	0	0.0178298	0	0	0.0178751	0	0	0	0	0	0	0	0	0.0180122	0	0	0.0537171
NOA_IDNA_1020_R1.tsv	0	0	0	0	0	0	0	0	0	0.0703705	0	0	0	0	0	0	0.0365183	0	0	0	0	0	0	0	0	0.106889
NOA_IDNA_3040_R1.tsv	0	0	0	0	0	0	0	0	0	0.826005	0	0	0	0	0	0	0	0	0.165482	0	0	0	0	0	0	0.991487
NOA_IDNA_3040_R2.tsv	0	0	0.085416	0	0	0	0	0	0	0	0	0	0	0	0	0	0	0	0	0	0	0	0	0	0	0.085416
NOA_IDNA_5060_R1.tsv	0	0	0	0	0	0	0	0	0	0.0310018	0	0	0	0.0617937	0	0	0	0	0	0	0	0	0.0622679	0	0	0.155063
NOA_IDNA_5060_R2.tsv	0	0	0	0	0	0	0	0	0	0	0	0	0	0.0362438	0	0	0	0.0375132	0	0	0	0	0.0365218	0.114444	0	0.224723
NOA_IDNA_510_R1.tsv	0	0	0	0	0	0	0	0	0	0	0	0	0	0	0	0	0	0	0	0	0	0	0	0	0	0
NOA_IDNA_510_R2.tsv	0.00930242	0	0	0.00955048	0.00949982	0	0.00960169	0	0.00947469	0.0182416	0	0	0	0.0181799	0	0	0	0.0282249	0.0091363	0.00949143	0	0.0188828	0	0.019135	0	0.168721
YUN_IDNA_1020_R1.tsv	0	0	0	0	0	0	0	0	0	0	0	0	0.0407302	0	0	0	0	0	0	0	0	0	0	0	0	0.0407302
YUN_IDNA_1020_R2.tsv	0	0	0	0	0	0	0	0	0	0	0	0	0	0	0	0	0	0	0.0249479	0	0	0	0	0	0	0.0249479
YUN_IDNA_3040_R1.tsv	0	0	0	0	0	0	0	0	0	0	0	0	0	0.0185752	0	0	0.0193444	0	0	0	0	0	0.0187177	0	0	0.0566373
YUN_IDNA_5060_R2.tsv	0	0	0	0	0	0	0	0	0	0	0	0	0	0	0	0	0	0	0	0	0	0	0	0.0816475	0	0.0816475
YUN_IDNA_510_R1.tsv	0	0	0	0	0	0	0	0	0	0.12517	0	0	0	0	0	0	0	0	0	0	0	0	0	0	0	0.12517

## Sheet: CoxL
file_id	Acidobacteriota | Acidibacteriales	Actinobacteriota | Acidimicrobiales	Actinobacteriota | Actinomycetales	Actinobacteriota | Corynebacteriales	Actinobacteriota | Jiangellales	Actinobacteriota | Microtrichales	Actinobacteriota | Nitriliruptorales	Actinobacteriota | Propionibacteriales	Actinobacteriota | Solirubrobacterales	Actinobacteriota | Streptomycetales	Actinobacteriota | Streptosporangiales	Bacteroidota | Chitinophagales	Bacteroidota | Flavobacteriales	Bacteroidota | Rhodothermales	Calditrichaeota | N/A	Chloroflexota | Ktedonobacterales	Chloroflexota | Thermoflexales	Chloroflexota | Thermomicrobiales	Crenarchaeota | Desulfurococcales	Crenarchaeota | Sulfolobales	Deinococcota | Deinococcales	Dormibacterota | Dormibacteriales	Firmicutes | Alicyclobacillales	Firmicutes | Bacillales	Firmicutes | Brevibacillales	Firmicutes | Kyrpidiales	Firmicutes | Sulfobacillales	Firmicutes | Thermaerobacteriales	Firmicutes | Thermicanales	Firmicutes | Thermoactinomycetales	Gemmatimonadota | Gemmatimonadales	Halobacterota | Halobacteriales	Marsarchaeota | N/A	Methylomirabilota | Rokubacteriales	Myxococcota | Kofleriales	Patescibacteria | N/A	Proteobacteria | Betaproteobacteriales	Proteobacteria | Ectothiorhodospirales	Proteobacteria | Enterobacterales	Proteobacteria | Kiloniellales	Proteobacteria | Nevskiales	Proteobacteria | Nitrococcales	Proteobacteria | Pseudomonadales	Proteobacteria | Rhizobiales	Proteobacteria | Rhodobacterales	Proteobacteria | Rhodospirillales	Proteobacteria | Thiohalospirales	Proteobacteria | Enterobacteriales	Proteobacteria | Nisaeales
TAL_IDNA_01_R1.tsv	0.0181866	0.109361	1.15167	7.39722	0.0345261	0.0243324	0.20211	0.170571	0.424219	2.06309	0.569858	0.150709	0.406029	0.125291	0.124226	0.408037	0.128111	0.218168	2.48434	0.182961	0.828426	0.238504	0.116798	0.135283	0.137345	0.0282941	0.0704022	0.277077	0.021337	0.115453	0.168664	1.17942	0.131386	0.83225	0.0897997	0.222209	1.08584	0.0110327	0.203147	0.0139192	0.0454815	0.038053	0.00717796	0.775374	0.566432	0.00356007	0.0216658	0	0
TAL_IDNA_01_R2.tsv	0.0213112	0.11266	0.97654	5.79132	0.0302361	0.0305496	0.145424	0.223474	0.314055	2.27724	0.526707	0.26921	0.346686	0.209738	0.167691	0.549588	0.111576	0.281766	2.38538	0.211379	0.962605	0.284276	0.112095	0.0903872	0.169412	0.0138147	0.140628	0.301787	0.0173631	0.138499	0.150062	0.910537	0.0962244	0.808161	0.118044	0.298804	0.935664	0.0107735	0.13921	0.0173124	0.0478294	0.0264977	0.010514	0.782368	0.555031	0.00696562	0.0396691	0.0106916	0.00685745
TAL_IDNA_1020_R1.tsv	0.087469	0.13008	0.958103	8.10678	0.0772178	0.0278637	0.216012	0.284394	0.481604	2.46432	0.88675	0.101098	0.177528	0.229558	0.146439	0.327078	0.127671	0.236516	2.52747	0.398914	0.945364	0.0843451	0.369629	0.298315	0.202804	0.0680406	0.411073	0.30183	0.0513104	0.0909524	0.258381	1.95681	0.12287	0.849784	0.0775196	0.22192	1.10228	0.0176873	0.0971329	0.0227381	0.0336531	0.0261453	0.0632915	1.28576	0.888731	0.0342445	0.0217089	0.0131647	0.0168873
TAL_IDNA_1020_R2.tsv	0.0927491	0.159153	1.15295	9.7835	0.0674828	0.027273	0.239323	0.283127	0.506659	2.383	0.569273	0.116418	0.173764	0.273842	0.0286669	0.434678	0.183372	0.268203	2.40592	0.157905	1.06486	0.165114	0.170578	0.356134	0.0708946	0.0138746	0.268698	0.309365	0.0348768	0.11128	0.191148	1.29854	0.236236	0.923019	0.0948451	0.257229	1.27227	0.00541011	0.0699071	0.00682557	0.0617617	0.069309	0.0774371	1.33964	2.12131	0.0209875	0.0106243	0.010738	0.034436
TAL_IDNA_3040_R1.tsv	0.0835047	0.24297	1.73789	15.1931	0.118476	0.0399013	0.305263	0.36394	0.966883	4.12836	1.46535	0.454194	0.254223	0.445156	0.202713	0.867493	0.417323	0.329871	4.67024	0.607773	2.17516	0.181175	0.565673	0.749203	0.554416	0.189458	0.443513	0.878402	0.15648	0.214185	0.487604	3.68377	0.342129	1.62942	0.118939	0.466933	1.54227	0.0527679	0.163642	0.0532589	0.120479	0.130002	0.10986	1.98781	1.65385	0.0409406	0.0466312	0	0.0201524
TAL_IDNA_3040_R2.tsv	0.146719	0.235343	1.948	15.4281	0.160126	0.0485358	0.434582	0.509846	1.09661	4.06888	1.57804	0.454471	0.303509	0.377651	0.192729	0.802216	0.273959	0.469494	5.51533	0.566502	1.88479	0.195894	0.501895	0.908665	0.291584	0.159124	0.371362	0.617242	0.121377	0.368569	0.505896	3.63562	0.390685	1.65922	0.0964509	0.412559	2.02958	0.0599075	0.281993	0.0440083	0.054278	0.216636	0.0971244	2.83651	1.84522	0.0719332	0.0882342	0.0169863	0.0490266
TAL_IDNA_5060_R1.tsv	0.0697497	0.405895	1.94997	15.8358	0.0527787	0.293293	0.271978	0.429062	0.910794	4.32904	1.07929	0.256081	0.0849389	0.302932	0.140128	0.758731	0.225747	0.458848	5.39203	0.676174	1.84831	0.30939	0.266821	0.27448	0.221788	0.122078	0.594019	0.490455	0.0818321	0.24478	0.30187	2.98414	0.265944	1.68543	0.264925	0.195592	3.29443	0	0.287042	0.0407967	0.295192	0.218546	0.135707	1.50853	1.48438	0	0.0727067	0.115476	0.0269326
TAL_IDNA_5060_R2.tsv	0.0843862	0.237088	1.64808	11.5223	0.135076	0.0496277	0.379674	0.401217	0.575629	2.9351	0.713573	0.251561	0.131747	0.300258	0.0652052	0.532794	0.1483	0.395628	2.85681	0.417941	1.46935	0.707314	0.363965	0.387557	0.161256	0.1073	0.250738	0.29398	0.0888498	0.156091	0.193979	2.91071	0.28658	1.29092	0.240388	0.292544	1.5874	0.0295338	0.0954056	0.0189837	0.0749238	0.140671	0.0640498	1.31788	0.62036	0.0127068	0.0386654	0.0293093	0.0187986
TAL_IDNA_510_R1.tsv	0.0509855	0.10879	1.09621	8.46919	0.0675152	0.0438526	0.20378	0.186221	0.591244	2.24977	0.823484	0.109194	0.181091	0.175624	0.0563369	0.342853	0.101922	0.267323	2.59843	0.34971	0.770169	0.103246	0.231658	0.284445	0.0810612	0.024788	0.202305	0.206342	0.0448631	0.0637529	0.136599	1.43431	0.0613893	0.746837	0.130717	0.275734	0.728871	0.0115987	0.154868	0.00497025	0.0441367	0.0190501	0.0305228	1.25709	0.792926	0.00499027	0.0227773	0.00767366	0.00984357
TAL_IDNA_510_R2.tsv	0.0430171	0.139072	1.49357	8.83309	0.0748598	0.00685167	0.181717	0.218161	0.558924	1.99415	0.967059	0.0434725	0.247373	0.162288	0.0864222	0.388274	0.19792	0.221951	3.11434	0.361587	1.07947	0.221231	0.398524	0.378932	0.171363	0.0627417	0.373866	0.378101	0.0490669	0.258597	0.265963	1.45523	0.122294	1.01953	0.102118	0.222588	1.83479	0.0380564	0.0215448	0	0.0275842	0.0321456	0.0565939	1.40466	0.945099	0.00701725	0.0320292	0	0.00692095
DGA_IDNA_01_R1.tsv	0.0794148	0.253723	1.5921	10.2238	0.136975	0.00892872	0.309666	0.191011	0.394894	2.77534	1.27516	0.271556	0.246513	0.29972	0.079773	0.896205	0.124512	0.323493	2.95038	0.3534	1.00941	0.148653	0.32967	0.557815	0.157826	0.0681347	0.23909	0.707145	0.0182689	0.118402	0.149226	2.04525	0.295296	0.90904	0.0887163	0.500595	0.82439	0.0247965	0.265482	0.00455391	0.0449328	0.0418904	0.0414844	1.61193	0.966402	0.00457225	0.031304	0	0.0135285
DGA_IDNA_01_R2.tsv	0.171459	0.486095	2.49846	15.4473	0.13354	0.0294104	0.432862	0.185929	0.711177	4.30016	1.63608	0.266576	0.405995	0.4846	0.19873	1.01299	0.217621	0.484863	4.71151	0.460933	1.74602	0.262841	0.490365	0.41309	0.227168	0.0726724	0.382925	0.652393	0.0472813	0.192859	0.280877	3.38676	0.384066	1.35848	0.179509	0.964252	2.91274	0.030004	0.46093	0	0.0507444	0.0722768	0.108449	2.17844	2.58682	0.00431091	0.0491012	0.0198506	0.0254638
DGA_IDNA_1020_R1.tsv	0.044964	0.118936	1.10913	10.0667	0.057995	0.0351578	0.258563	0.241109	0.744179	2.54207	0.610956	0.0666997	0.240593	0.189077	0.0903335	0.505284	0.190665	0.166088	3.61353	0.464684	0.88897	0.126133	0.338089	0.44638	0.105607	0.063594	0.249223	0.405697	0.143872	0.103604	0.294849	2.39333	0.0943332	0.799802	0.128087	0.278376	1.31534	0.0464947	0.058347	0.00796955	0.027522	0.0580371	0.0397652	1.48416	0.667649	0.0120245	0.0182611	0.00922825	0.0118378
DGA_IDNA_1020_R2.tsv	0.039379	0.0946243	1.33194	9.30201	0.0977734	0.0329291	0.273623	0.255486	0.664811	2.36929	0.62452	0.105381	0.169839	0.247067	0.0988915	0.4527	0.224915	0.25715	2.96349	0.615672	1.05104	0.147144	0.599583	0.342066	0.176151	0.0717943	0.276298	0.293244	0.096251	0.139157	0.213036	1.41936	0.153109	0.968393	0.112178	0.236628	1.59875	0.0373263	0.11094	0.0239925	0.127835	0.0697719	0.0922823	1.07349	1.04893	0.0144535	0.0219903	0.0259298	0.0237586
DGA_IDNA_3040_R1.tsv	0	0.264699	1.8458	12.5385	0.356206	0	0.18291	0.278714	0.602928	4.96332	1.69416	0.382708	0.207719	0.202043	0.0685372	0.395899	0.292272	0.151869	3.93223	0.258081	1.93911	0.148034	1.17452	0.536997	0.033975	0.116101	0.197664	0.233219	0.100061	0.133025	0.474575	3.77226	0.30807	1.25841	0.21056	0.17083	0.441711	0.0517383	0	0	0.0492203	0.0641994	0	2.41571	1.06732	0.0334515	0	0	0
DGA_IDNA_3040_R2.tsv	0	0	0	0.456209	0	0.237402	0.484327	0.732636	0.949268	0.935559	0.477535	0	1.00837	0	0	0	0	0	0	0.755705	0.982268	0	0.241723	0	0	0	0	1.94085	0.242872	0	0.511961	7.49887	0	1.21659	0.235884	0	0.2358	0	0	0	0	0	0.185894	0	0.241459	0	0	0	0
DGA_IDNA_5060_R1.tsv	0	0.0593152	1.6657	17.982	0.260307	0.263006	0.059618	0.436159	0.321336	5.90622	4.8789	0.216315	0.868875	0.451415	0.276447	0.0295504	0.291084	0.514255	3.11681	0.372092	0.828719	0.0884592	1.22261	0.208892	0.0607705	0.178399	0.944928	0.383047	0.0597924	0.294121	0.409627	2.33786	0.0920454	1.15636	0.29036	0.21437	2.38793	0	0.389506	0.0585084	0.0588242	0.091249	0.0603442	2.33617	0.29995	0	0	0.161079	0
DGA_IDNA_510_R1.tsv	0.0329316	0.0678722	0.929422	5.26454	0.0469724	0	0.193317	0.190584	0.417649	1.32009	0.454906	0.0629478	0.0919029	0.198513	0.0454852	0.358283	0.109719	0.103542	1.4509	0.13252	0.481805	0.119083	0.192688	0.157942	0.0613566	0.0280185	0.202734	0.194362	0.0603692	0.0871077	0.110287	0.989461	0.0991287	0.466539	0.0703585	0.259725	0.594247	0.0031215	0.0484015	0.0120386	0.00791888	0.0184258	0.0081235	0.879785	0.637699	0.00805806	0.00612996	0.00619554	0.0198687
DGA_IDNA_510_R2.tsv	0.0523439	0.212301	1.73943	8.73304	0.04951	0.0409282	0.324716	0.221722	0.630646	2.00454	0.780061	0.21353	0.207647	0.337191	0.10994	0.625855	0.217429	0.271609	3.00084	0.382976	1.06112	0.146835	0.27305	0.437803	0.165496	0.0601508	0.285523	0.385723	0.0744379	0.0603043	0.210849	1.39353	0.353322	0.691945	0.153629	0.366957	1.35055	0.0288671	0.12589	0.0278328	0.0320392	0.0391153	0.0142436	1.50481	1.47493	0.0233301	0.0141722	0	0.0459356
MES_IDNA_01_R2.tsv	0.0380516	0.0365738	0.303671	1.9392	0	0	0	0	0	0.509469	0.882851	0	0.0772299	0.0375597	0	0.0752585	0.0181111	0.0941079	0.978695	0.191909	0.0763889	0	0.111689	0.0374353	0.0568434	0	0	0.0371618	0	0	0.098026	0.275592	0	0.162739	0.0541981	0.0190543	0.0718557	0	0	0	0	0	0	0.264973	0.0376292	0.0372434	0	0	0.0183662
MES_IDNA_1020_R1.tsv	0.0695617	0	0	0.1343	0	0	0	0	0	1.251	0.0335266	0	0	0	0	0	0	0	0	0	0.104734	0	0	0	0	0	0	0	0	0	0.0358401	0	0	0	0	0.034833	0.64562	0	0	0	0	0	0	0.172102	0.0340671	0	0	0	0
MES_IDNA_1020_R2.tsv	0.0170153	0	0.19739	1.36558	0	0	0.0165871	0.11326	0.0645363	1.81158	0.0820381	0.0520388	0.0518017	0.133967	0	0.115186	0	0.0493832	0.372803	0.0692794	0.187238	0	0.0162726	0	0.0508367	0	0	0.0332349	0	0.0327326	0.175335	0	0	0.0335165	0	0	0.661315	0.0129027	0.0166723	0	0	0	0.0503676	0.166845	0.149612	0	0	0	0
MES_IDNA_3040_R1.tsv	0	0	0	6.60945	0	0	0	0	0	0	0.6182	0	0	0	0	0	0	0	0.176754	0	0	0	0.133088	0	0	0	0	0	0	0	0.0956	0	0	0	0	0	0	0	0	0	0	0	0	0.318398	1.22541	0	0	0	0
MES_IDNA_3040_R2.tsv	0	0	0.100583	0.180007	0	0	0.0398869	0.097583	0.0811116	0.353158	0	0	0	0.0204795	0	0.0603715	0.0594255	0	0.118936	0	0.793709	0	0	0.061101	0	0	0.0201384	0	0	0	0	0.502188	0	0.355983	0	0	1.21979	0	0	0	0	0	0	0.285661	0	0	0	0	0
MES_IDNA_5060_R1.tsv	0.015173	0.029432	0.248102	0.851733	0.158709	0	0.00739557	0.0498072	0.192215	0.453947	0.051043	0.046422	0	0.0223991	0	0.0146628	0.0433305	0.00750506	0.32521	0.0538508	0.190374	0.0365777	0.125771	0	0.0150771	0	0.0293681	0	0.00741721	0.065674	0.0156351	0.0367101	0.0456727	0.0730032	0.00720379	0.0379893	0.205949	0	0	0	0.0875653	0.00571069	0	0.191239	0.0222924	0	0	0	0
MES_IDNA_5060_R2.tsv	0.0126337	0.061266	0.0854933	0.753318	0.0238994	0	0	0.0473963	0.0239587	0.386631	0.310253	0	0.0256415	0.0124704	0.0126907	0	0	0	0.132384	0.0128305	0.0246046	0.0121825	0.144987	0.111288	0.0754915	0.0122844	0.0366798	0.0740296	0.0123518	0	0.0130184	0.0931032	0	0.0540317	0.0119964	0	0.363507	0	0	0	0.0121518	0	0	0.196765	0.158946	0	0	0	0
MES_IDNA_510_R1.tsv	0	0.441173	0	5.04967	0	0	0	0.426622	0	0.865082	0	0	0	0	0	0	0	0	2.4055	1.83736	1.10735	0	0	0	0	0	0	0	0	0	0	0	1.36615	0	0	0.455554	2.60172	0	0	0	0	0	0	0	0	0	0	0	0
MES_IDNA_510_R2.tsv	0	0.0611786	1.29445	3.31432	0.00852332	0	0.122982	0.00851428	0.427224	3.26588	0.757503	0.0459323	0.0182892	0.106422	0.0181037	0.15149	0.223027	0.106974	2.35204	0.0725236	0.828433	0.0521362	0.0261341	0.0705585	0.0179085	0.00876206	0.304567	0.334418	0.0176203	0	0.232141	0.488543	0.0542498	0.192695	0	0.0992716	0.768639	0.0204995	0.0529771	0	0.0693398	0.0746145	0.00674326	1.04382	0.650294	0.0264594	0.0201283	0	0
NOA_IDNA_01_R1.tsv	0	0.0331373	0.31378	2.29377	0.0242374	0	0	0.0242117	0.0244799	1.03012	0.372695	0.051792	0.0520083	0.0758806	0	0.181728	0.146357	0.0760491	0.615961	0.156143	0.43713	0.00823652	0.0408437	0.0752415	0.0339504	0.00830543	0.074397	0.150153	0.050106	0.0657262	0.0088017	0.239118	0.00857043	0.0913265	0	0.0342175	0.367175	0.00647706	0.0334775	0	0	0.0063829	0	0.156043	0.0657498	0	0.00635978	0	0
NOA_IDNA_01_R2.tsv	0.00790435	0.0227921	0.140118	1.55976	0.0300652	0	0.00770544	0.0448109	0	0.439088	0.157674	0.00806117	0	0	0.01588	0.226682	0	0.0305875	0.323777	0.00795194	0.0546961	0.00762205	0.00764134	0	0	0	0	0.0849147	0	0.0684256	0	0.091829	0	0.0154843	0	0.0791619	0.835323	0	0	0	0.0228085	0.00594996	0	0.401021	0.0460814	0	0	0	0
NOA_IDNA_1020_R1.tsv	0	0.0447122	0.254835	1.03284	0	0	0.0453482	0.0727162	0	0.14615	0.117834	0.0470112	0	0.0152608	0.0155762	0.0153342	0	0.0766992	0.413596	0	0.232681	0	0.0148294	0	0	0	0	0	0	0	0.0159785	0.0150066	0.0933519	0.076685	0	0.062118	0.312088	0	0	0	0	0	0	0.0925873	0.0151603	0	0	0	0
NOA_IDNA_1020_R2.tsv	0	0	0	1.65941	0	0	0	0.0297834	0.355229	0.266708	0.857551	0	0.314456	0.152481	0	0	0	0.122617	1.1512	0.0312557	0.543132	0.0298801	0.148171	0	0.123164	0.0301301	0.17993	0.151311	0	0	0	0.149941	0.186549	0.0316498	0	0.0310332	0.204729	0.0234972	0.121448	0	0.119219	0	0	4.7167	0.26834	0	0	0	0
NOA_IDNA_3040_R1.tsv	0	0	0.422293	4.30761	0.068863	0	0	0.0715729	0.621306	1.24349	0.345783	0.222662	0	0	0	0.287986	0.0693044	0.0720232	2.01126	0.22148	0	0	0	0	0	0	0	0.0701538	0	0	0.450131	0.63093	0	0.21607	0	0	0.275647	0	0	0	0.140055	0.054405	0	4.83989	0.354217	0	0	0	0
NOA_IDNA_3040_R2.tsv	0	0.011999	0.0710991	0.298041	0	0	0	0.0490904	0.0121298	0.199956	0.11999	0.0636331	0.0506745	0.0369673	0.0376203	0	0.0118836	0.0241543	0.0480132	0	0.18789	0	0.108616	0.110535	0.0372979	0.0121387	0.0241631	0.0121919	0.0244105	0.0121696	0.038592	0.252128	0.0250519	0.172653	0	0	0.265313	0	0	0	0	0	0.00934187	0.269699	0.110291	0	0	0	0
NOA_IDNA_5060_R1.tsv	0	0.0198767	0.145288	2.38175	0	0	0.033297	0.0192211	0.0261044	0.272926	0.0651679	0.0278673	0.0138649	0	0	0.0197905	0.0130057	0.0396527	0.295576	0.139071	0.260564	0	0.00653311	0	0	0	0.0197905	0.266862	0	0	0.00703934	0.275936	0	0.10956	0.0324335	0.0342077	0.273634	0	0.0205284	0	0	0.0102845	0.02556	0.348961	0.153896	0	0	0.0102816	0
NOA_IDNA_5060_R2.tsv	0	0.0462137	0.643751	1.31611	0	0	0.107523	0.0450949	0.0303938	1.25014	0.0608957	0	0	0	0	0	0	0.12684	0.290079	0	0.0961979	0.0463638	0	0	0.0637265	0	0	0.0313044	0	0	0	0	0	0	0	0	2.30571	0	0	0	0	0	0.063256	0.261878	0.203702	0	0	0	0
NOA_IDNA_510_R1.tsv	0	0	0	0	0	0	0	0	0	0	0	0	0	0	0	0	0	0	0	0	0	0	0	0	0	0	0	0	0	0	0	0	0	0	0	0	0	0	0	0	0	0	0	0	0	0	0	0	0
NOA_IDNA_510_R2.tsv	0.0281369	0.120854	1.22277	6.68449	0.068435	0.0192068	0.211594	0.431912	0.190569	1.81378	0.439088	0.101553	0.0856607	0.126964	0.0888292	0.170923	0.0497421	0.0933272	2.69948	0.138008	0.697996	0.015504	0.219114	0.200571	0.099854	0.0351759	0.120591	0.2169	0.0117896	0.17241	0.140827	0.491544	0.120994	0.605978	0.0687024	0.177126	0.718324	0.0152401	0.114217	0.00783683	0.0115987	0.0209908	0.0079323	0.736183	0.424272	0.0157368	0.017957	0.00604971	0.0232812
YUN_IDNA_01_R1.tsv	0.135035	0	0.0321013	4.31373	0	0	0	0	0	0	0	0	0	0	0	0	0	0	0	0.0340517	0.0677454	0	0	0	0	0	0	0	0	0	0	0	0	0.180474	0	0	0	0	0	0	0	0	0	0	0.0327182	0	0	0	0
YUN_IDNA_01_R2.tsv	0	0	0	0.169444	0	0	0	0	0	0	0	0	0	0	0	0	0	0	0	0	0	0	0	0	0	0	0	0	0	0	0	0	0	0	0	0	0	0	0	0	0	0	0	0	0	0	0	0	0
YUN_IDNA_1020_R1.tsv	0	0.0335098	0.353889	3.6023	0.0329762	0	0.0339864	0.0653969	0.084935	1.08091	0.41396	0	0.0354472	0.0343117	0.122573	0.151721	0	0.151776	1.04615	0	0.827136	0	0	0	0	0	0.0506104	0.0170242	0	0.0167669	0.0179627	0	0.157417	0.460327	0.033105	0.0349159	0.51459	0	0.0683216	0	0.0167669	0.0521055	0	0.320301	0.0168885	0.0170616	0	0	0
YUN_IDNA_1020_R2.tsv	0.010976	0.149036	0.381987	3.57668	0	0	0.0420778	0.200444	0.0727493	1.03956	0.229862	0.0443686	0.0445539	0.0758387	0.0110255	0	0.0104483	0	0.679621	0.100552	0.187292	0.010584	0	0	0.0109106	0	0	0.105763	0	0	0.101792	0.0741948	0	0.152561	0	0.054962	0.31356	0	0.0430187	0	0	0	0	0.389022	0.0107311	0.0752	0	0	0
YUN_IDNA_3040_R1.tsv	0	0.0236849	0.0714657	0.935255	0.0234321	0	0	0.10015	0.0233656	0.429588	0.0465495	0	0	0	0.00825098	0.0793777	0	0	0.234738	0.0499754	0.00811977	0	0	0	0.0163241	0	0	0.0802187	0	0.00790064	0	0.0317971	0	0.0335588	0.0233988	0	0.461893	0	0.0160967	0	0	0	0.00810479	0.0964387	0.329861	0	0.0183475	0	0
YUN_IDNA_5060_R1.tsv	0	0	0	1.07629	0	0	0.0524484	0.0504609	0	0.050302	0	0	0.109405	0	0	0.207973	0.102431	0	0.256261	0	0.212742	0	0	0.052931	0	0	0	0	0	0	0	0	0	0	0	0	1.2551	0	0	0.157345	0.0517501	0	0	3.05106	0.160149	0	0	0	0
YUN_IDNA_5060_R2.tsv	0	0	0.33161	0.0647987	0	0	0	0.0978551	0.0333298	0	0	0	0	0	0	0	0	0	0.692624	0	0	0	0	0	0	0	0	0	0	0	0	0.0346393	0	0.0366761	0	0	1.13075	0	0.0672215	0	0	0.0512665	0	0.170365	0	0	0	0.0516274	0
YUN_IDNA_510_R1.tsv	0	0	0.262368	4.94164	0	0	0.0537748	0	0	1.09146	2.34214	0	0	0	0	0	0	0	0.840773	0	0	0	0	0	0.0548347	0	0.373698	0	0	0	0.056843	0.320429	0	0	0.0523803	0.110491	0	0	0	0	0	0	0	0.373428	0	0	0	0	0
YUN_IDNA_510_R2.tsv	0.0201787	0.0587129	0.740473	5.44749	0.114924	0	0.116036	0.562456	0.0983186	2.64476	1.16748	0.18514	0.286684	0.159343	0	0.195143	0.0960427	0.0399242	1.61467	0.101501	0.059842	0	0.117044	0	0.0401919	0	0.0194861	0.0972199	0	0	0.124759	0.292292	0	0.2589	0.0766431	0.242507	0.464479	0	0	0.0196709	0	0	0	0.321895	0.70277	0.237001	0	0	0.0389582
[truncated: 1 more columns]

## Sheet: CooS
file_id	Alkaliphilus peptidifermentans	Alkaliphilus transvaalensis	Anaeromicrobium sediminis	Anaerovirgula multivorans	Blautia hydrogenotrophica	Calderihabitans maritimus	Caldicellulosiruptor saccharolyticus	Caloramator mitchellensis	Caloranaerobacter azorensis	Campylobacter concisus	Candidatus Kryptonium thompsoni	Candidatus Methanoperedens nitroreducens	Candidatus Syntrophoarchaeum caldarius	Candidatus Verstraetearchaeota archaeon	Clostridium estertheticum	Clostridium pasteurianum	Desulfatirhabdium butyrativorans	Desulfobacca acetoxidans	Desulfocapsa sulfexigens	Desulfofarcimen acetoxidans	Desulfofundulus australicus	Desulfofustis glycolicus	Desulfonema ishimotonii	Desulfurispora thermophila	Dethiobacter alkaliphilus	Dethiosulfatarculus sandiegensis	Ferroglobus placidus	Geosporobacter ferrireducens	Gottschalkia acidurici	Halonatronum saccharophilum	Hungatella hathewayi	Lachnoanaerobaculum saburreum	Lactonifactor longoviformis	Methanofollis liminatans	Methanoregula boonei	Natronincola ferrireducens	Natronincola peptidivorans	Orenia marismortui	Pseudobutyrivibrio xylanivorans	Rubrivivax gelatinosus	Ruminiclostridium cellulolyticum	Ruminiclostridium hungatei	Ruminiclostridium josui	Ruminiclostridium papyrosolvens	Ruminococcus albus	Ruminococcus flavefaciens	Sharpea azabuensis	Stomatobaculum longum	Thermococcus radiotolerans
TAL_IDNA_01_R1.tsv	0.00403593	0.00405275	0.00442336	0.0175974	0.00442135	0.00419437	0.00437755	0.00409198	0.00439139	0.00834195	0.0170571	0.0119834	0.00452633	0.0138761	0.00414784	0.00441132	0.00434624	0.00433462	0.0137389	0.00431538	0.0302614	0.00427741	0.00438348	0.0215482	0.0041674	0.00431921	0.00451372	0.0040937	0.00404769	0.00413902	0.0043815	0.0201045	0.00416919	0.00419799	0.00415494	0.00828509	0.00407654	0.00412672	0.0159976	0.00421437	0.00410234	0.00406631	0.00411449	0.00822203	0.00809201	0.0161571	0.00410581	0.00386582	0.00870806
TAL_IDNA_01_R2.tsv	0	0	0.0129583	0	0	0	0	0	0	0	0.0041641	0	0	0	0	0.00877868	0	0.00423279	0	0	0.00844299	0.00417692	0.00428049	0.00841679	0	0.00421774	0.00440768	0	0	0	0	0.0196322	0.00863103	0	0	0	0	0.00432338	0.0273381	0	0	0	0	0	0	0.0157775	0	0	0
TAL_IDNA_1020_R1.tsv	0	0	0	0	0.00708821	0.0134486	0	0	0	0	0	0	0	0	0	0	0	0.00694916	0.00734196	0	0	0	0	0.0414547	0	0	0.00723629	0	0	0	0	0	0.0267358	0	0.0066611	0	0	0	0.00641175	0	0	0	0	0	0	0	0.0131647	0	0
TAL_IDNA_1020_R2.tsv	0	0	0	0	0	0	0	0	0.00861366	0	0	0	0	0	0.0162719	0	0	0	0	0	0.00847961	0	0	0.0253599	0	0	0	0	0	0	0.00830242	0	0.00817781	0	0	0	0.00799608	0	0	0	0	0	0	0	0	0	0	0	0
TAL_IDNA_3040_R2.tsv	0.00626145	0	0	0	0	0	0	0.00634842	0	0.012942	0	0	0	0	0	0	0	0	0	0	0.00670691	0	0	0.0066861	0	0	0	0	0.0062797	0	0	0	0.0064682	0.0195387	0	0	0.00632446	0	0	0	0	0	0	0	0	0	0	0	0
TAL_IDNA_5060_R1.tsv	0	0	0	0	0	0	0	0	0	0	0	0	0	0	0	0	0	0	0.0175639	0	0.0165799	0	0	0.132228	0	0	0	0	0	0	0.0336081	0	0	0	0	0	0	0	0	0	0	0	0	0	0	0	0	0	0
TAL_IDNA_5060_R2.tsv	0	0	0	0	0	0	0	0	0	0	0	0	0	0	0	0	0.00761681	0	0	0	0	0	0	0.0538376	0	0	0	0	0	0	0.00781933	0	0	0	0	0	0	0	0.00713743	0	0	0	0	0	0	0	0	0	0
TAL_IDNA_510_R1.tsv	0	0	0	0	0	0.0117588	0	0	0	0	0	0	0.0063447	0	0	0	0.00598262	0	0	0	0	0	0	0.00604097	0	0	0.0126541	0	0	0.0058018	0	0	0	0	0	0	0.0114284	0.00578456	0	0	0	0.00569988	0	0	0	0	0	0	0
TAL_IDNA_510_R2.tsv	0	0	0	0.00867154	0	0	0	0.0161314	0	0	0	0	0.00892184	0	0.0163516	0	0.00856688	0.00854397	0	0	0.00852117	0	0	0.0254842	0	0.0085136	0.017794	0	0	0	0	0	0.0246537	0	0	0	0.0241058	0	0	0	0	0	0	0	0	0	0	0	0.00858223
DGA_IDNA_01_R1.tsv	0	0.00520501	0	0	0	0	0	0	0.00563994	0.0267842	0	0.00513016	0.00581323	0	0	0.00566552	0.010963	0.00556702	0	0	0.00555216	0	0	0.0110699	0	0	0	0	0	0	0	0.0206564	0.0214182	0.0104448	0	0	0	0	0	0.00541258	0	0	0	0	0	0	0.00527315	0.00992987	0
DGA_IDNA_01_R2.tsv	0	0	0.0267324	0.00531744	0	0	0	0	0.0159235	0.0151243	0	0.00965616	0	0	0	0	0.0103174	0	0	0	0	0.00517006	0	0.00520902	0	0	0	0	0	0	0	0.00486003	0	0	0	0	0	0	0.00483404	0	0	0	0	0	0	0.00488224	0	0	0
DGA_IDNA_1020_R1.tsv	0	0	0	0	0	0	0	0	0.00493507	0	0.00479222	0	0	0	0	0	0	0	0	0	0	0	0	0.0145296	0	0	0	0	0	0	0.00492395	0	0.00468536	0	0	0	0	0	0	0	0	0	0	0	0	0	0	0	0.00489308
DGA_IDNA_1020_R2.tsv	0	0	0	0	0	0	0	0	0	0.00564458	0	0	0	0	0	0	0.00588177	0	0	0.0177965	0.0117008	0.0115772	0	0.0116645	0	0	0	0	0	0	0	0	0.0183508	0.00568114	0	0	0	0	0	0	0	0	0	0	0	0	0	0	0
DGA_IDNA_3040_R1.tsv	0	0	0	0	0	0	0	0	0	0	0	0	0	0	0	0	0	0	0	0	0.0608196	0	0	0.0606308	0	0	0	0	0	0	0	0	0	0	0	0	0	0	0	0	0	0	0	0	0	0	0	0	0
DGA_IDNA_5060_R1.tsv	0	0	0	0	0	0	0	0	0	0	0	0	0	0	0	0	0	0	0	0	0	0	0	0	0	0	0	0	0	0	0	0	0.210299	0	0	0.333164	0	0	0	0	0	0	0	0	0	0	0	0	0
DGA_IDNA_510_R1.tsv	0	0	0	0	0.00509647	0	0	0	0	0	0	0	0.0102451	0	0	0	0.00491877	0.00943678	0	0	0.0146776	0	0	0.0243867	0	0	0	0	0	0	0	0	0.00943678	0	0	0	0	0	0	0	0	0	0	0	0	0	0	0	0
DGA_IDNA_510_R2.tsv	0.00528002	0	0	0.00575547	0.00589142	0	0	0	0	0	0	0	0	0	0	0	0.005686	0	0	0	0.0113113	0.00559594	0	0.0112762	0	0	0	0	0	0	0	0	0	0	0.00543572	0	0	0	0.00523224	0	0	0.00531977	0.00538281	0.0107565	0	0	0	0	0
MES_IDNA_01_R2.tsv	0	0	0	0	0	0	0	0	0	0	0	0	0	0	0	0	0	0	0	0	0	0.0223739	0	0.0225425	0	0	0	0	0	0	0	0	0	0	0	0	0	0	0	0	0	0	0	0	0	0	0	0	0
MES_IDNA_1020_R1.tsv	0	0	0	0	0	0	0	0	0	0	0	0	0	0	0	0	0	0	0	0	0	0	0	0	0	0	0	0	0	0	0	0	0	0	0	0	0	0	0	0	0	0	0	0	0	0	0	0	0
MES_IDNA_1020_R2.tsv	0	0	0	0	0	0	0	0	0	0	0	0	0	0	0	0	0	0	0	0	0	0.0200096	0	0	0	0	0	0	0	0	0	0	0	0	0	0	0	0	0	0	0	0	0	0	0	0	0	0	0
MES_IDNA_3040_R1.tsv	0	0	0	0	0	0	0	0	0	0	0	0	0	0	0	0	0	0	0	0	0	0	0	0.0549615	0	0	0	0	0	0	0	0	0	0	0	0	0	0	0	0	0	0	0	0	0	0	0	0	0
MES_IDNA_3040_R2.tsv	0	0	0.101223	0	0	0	0.0751314	0	0.075369	0	0	0	0	0	0	0.100948	0	0	0	0.0987524	0	0.0244709	0	0.0246553	0	0	0	0	0	0	0	0	0	0	0	0	0	0	0	0	0	0	0	0	0	0	0	0	0
MES_IDNA_5060_R1.tsv	0	0	0	0	0.0187852	0	0	0	0	0	0	0	0	0	0	0	0	0	0	0	0	0.0713723	0	0.0269663	0	0	0	0	0	0	0	0	0	0	0	0	0	0	0	0	0	0	0	0	0	0	0	0	0
MES_IDNA_5060_R2.tsv	0	0	0.0153639	0	0	0	0	0	0	0	0	0	0	0	0	0	0.0148243	0	0	0	0	0	0	0	0	0	0	0	0	0	0	0.027932	0	0	0	0	0	0	0	0	0	0	0	0	0	0	0	0.0268547	0
MES_IDNA_510_R1.tsv	0	0	0	0	0	0	0	0	0	0	0	0	0	0	0	0	0	0	0	0	0	0	0	0	0	0	0	0	0	0	0	0	0	0	0	0	0	0	0	0	0	0	0	0	0	0	0	0	0
MES_IDNA_510_R2.tsv	0	0	0.0109586	0	0	0	0.0108451	0	0.0108794	0	0	0	0	0	0	0.0109287	0	0.0107387	0	0.010691	0	0	0	0	0	0.0107005	0	0	0	0	0	0	0	0	0	0	0	0.0109685	0	0	0	0	0	0	0	0	0	0	0
NOA_IDNA_01_R1.tsv	0	0	0.0103875	0	0	0	0.0102799	0	0.0103124	0	0	0	0	0	0	0.0103592	0	0	0	0.0101339	0	0	0	0	0	0.0101429	0	0	0	0	0	0	0	0	0	0	0	0.0103969	0	0	0	0	0	0	0	0	0	0	0
NOA_IDNA_01_R2.tsv	0	0	0	0	0	0	0	0	0	0	0	0	0	0	0	0	0	0	0	0	0	0.0464767	0	0	0	0	0	0	0	0	0.0275947	0.00873793	0	0	0	0	0	0	0	0	0	0	0	0	0	0	0	0	0
NOA_IDNA_1020_R1.tsv	0	0	0	0	0	0	0	0	0	0	0	0.018211	0	0	0	0	0	0	0	0	0	0	0	0	0	0	0	0	0	0	0	0	0	0	0	0	0	0	0	0.0179663	0	0	0	0	0	0	0	0	0
NOA_IDNA_1020_R2.tsv	0	0	0	0	0	0	0	0	0	0	0	0	0	0	0	0	0	0	0	0	0.0368286	0	0	0	0	0.110388	0	0	0	0	0	0	0	0	0	0	0	0	0	0	0	0	0	0	0	0	0	0	0
NOA_IDNA_3040_R1.tsv	0	0	0	0	0	0	0	0	0	0	0	0	0	0.0925817	0	0	0	0	0	0	0	0	0	0	0	0	0	0	0	0	0	0	0	0	0	0	0	0	0	0	0	0	0	0	0	0	0	0	0
NOA_IDNA_3040_R2.tsv	0	0	0	0	0	0	0	0	0	0	0	0	0	0	0	0	0	0	0	0	0	0.0146807	0	0	0	0	0	0	0	0	0	0	0	0	0	0	0	0	0	0	0	0	0	0	0	0	0	0	0
NOA_IDNA_5060_R1.tsv	0	0	0	0	0	0	0	0	0	0	0.0320352	0	0	0	0	0	0	0	0	0	0	0	0	0	0	0.0243359	0	0	0	0	0	0	0	0.00763699	0	0	0	0	0	0	0	0	0	0	0	0	0	0	0
NOA_IDNA_5060_R2.tsv	0	0	0	0	0	0	0	0	0	0	0	0	0	0	0	0	0	0	0	0	0	0	0	0	0	0	0	0	0	0	0	0	0	0	0	0	0	0	0	0	0	0	0	0	0	0	0	0	0
NOA_IDNA_510_R1.tsv	0	0	0	0	0	0	0	0	0	0	0	0	0	0	0	0	0	0	0	0	0	0	0	0	0	0	0	0	0	0	0	0	0	0	0	0	0	0	0	0	0	0	0	0	0	0	0	0	0
NOA_IDNA_510_R2.tsv	0	0	0	0	0	0	0	0	0.00485289	0	0.00471241	0.00441425	0	0	0	0	0	0	0	0.00476888	0	0.0189077	0	0.00952508	0	0	0	0	0	0	0	0	0	0	0.00459158	0	0	0	0	0.00465726	0	0	0	0	0	0	0	0	0.0048116
YUN_IDNA_01_R1.tsv	0	0	0	0	0	0	0	0	0	0	0	0	0	0	0	0	0	0	0	0	0	0.555793	0	0	0	0	0	0	0	0	0	0	0	0	0	0	0	0	0	0	0	0	0	0	0	0	0	0	0
YUN_IDNA_01_R2.tsv	0	0	0	0	0	0	0	0	0	0	0	0	0	0	0	0	0	0	0	0	0	0	0	0	0	0	0	0	0	0	0	0	0	0	0	0	0	0	0	0.217846	0	0	0	0	0	0	0	0	0
YUN_IDNA_1020_R1.tsv	0	0.0194228	0	0	0	0	0	0	0	0	0	0	0	0	0	0	0	0	0	0	0	0	0	0	0	0	0	0	0	0	0	0	0	0	0	0	0	0	0	0	0	0	0	0	0	0	0	0	0
YUN_IDNA_1020_R2.tsv	0	0	0	0	0	0	0	0	0	0	0	0	0	0	0	0	0	0	0	0	0	0	0	0.0390143	0	0	0	0	0	0	0	0	0	0	0	0	0	0	0	0	0	0	0	0	0	0	0	0	0.0131387
YUN_IDNA_3040_R1.tsv	0	0	0.019978	0	0	0	0.0197712	0	0.0198337	0	0	0	0	0	0	0.0199237	0	0	0	0.0194903	0	0.0289783	0	0.00973221	0	0	0	0	0	0	0	0	0	0	0	0	0	0.00999812	0	0	0	0	0	0	0	0	0	0	0
YUN_IDNA_5060_R1.tsv	0	0	0	0	0.0653995	0	0	0	0	0	0	0	0	0	0	0	0	0	0	0	0	0.189811	0	0	0	0	0	0	0	0	0	0	0	0	0	0	0	0	0	0	0	0	0	0	0	0	0	0	0
YUN_IDNA_5060_R2.tsv	0	0	0	0	0	0	0	0	0	0	0	0	0	0	0	0	0	0	0	0	0	0	0	0	0	0	0	0	0	0	0	0	0	0	0	0	0	0	0	0	0	0	0	0	0	0	0	0	0
YUN_IDNA_510_R2.tsv	0	0	0	0	0	0	0	0	0	0	0	0	0	0	0	0	0	0	0	0	0	0	0	0	0	0	0	0	0	0	0	0	0	0	0	0	0	0	0	0	0	0	0	0	0	0	0	0	0
[truncated: 173 more columns]

## Sheet: PsaA
file_id	Chlorobi-type	Chloroplast-type	Cyanobacteria-type	Firmicutes-type	Acidobacteria-type	SUM
TAL_IDNA_01_R1.tsv	0.00388591	0.0219059	0.0185971	0.00478943	0	0.0491783
TAL_IDNA_01_R2.tsv	0.00756505	0.00355852	0.0145281	0.00461553	0.00323811	0.0335053
TAL_IDNA_1020_R1.tsv	0.0125448	0.0642641	0.047612	0.0153945	0	0.139816
TAL_IDNA_1020_R2.tsv	0	0.0428875	0.0729558	0.0834399	0	0.199283
TAL_IDNA_3040_R2.tsv	0.024038	0.0172125	0.0114837	0.0219988	0	0.074733
TAL_IDNA_5060_R1.tsv	0	0.0139761	0.0542966	0	0	0.0682727
TAL_IDNA_5060_R2.tsv	0	0.175592	0.0568474	0.0168703	0	0.24931
TAL_IDNA_510_R1.tsv	0.00542965	0.00516228	0.0668312	0.00671351	0	0.0841366
TAL_IDNA_510_R2.tsv	0.0152641	0.0215489	0.0737365	0.0283214	0	0.138871
DGA_IDNA_01_R1.tsv	0.00998147	0.00936745	0.0472985	0.00615114	0	0.0727986
DGA_IDNA_01_R2.tsv	0	0.013354	0.0730193	0	0	0.0863734
DGA_IDNA_1020_R1.tsv	0.0523831	0.0372486	0.0500821	0.00538239	0	0.145096
DGA_IDNA_1020_R2.tsv	0.0523995	0.0296452	0.0496323	0.00633181	0	0.138009
DGA_IDNA_3040_R1.tsv	0	0.0684858	0	0	0	0.0684858
DGA_IDNA_3040_R2.tsv	0	1.24674	0.252765	0	0	1.4995
DGA_IDNA_5060_R1.tsv	0	0.247686	0.278015	0	0	0.5257
DGA_IDNA_510_R1.tsv	0.00885576	0.00824834	0	0	0	0.0171041
DGA_IDNA_510_R2.tsv	0.0101675	0.0381397	0.0194415	0.00628127	0.00867638	0.0827063
MES_IDNA_01_R2.tsv	0	0	0.0774062	0	0	0.0774062
MES_IDNA_1020_R1.tsv	0	0	0.143085	0	0	0.143085
MES_IDNA_1020_R2.tsv	0.0181203	0.0511416	0.0781141	0	0	0.147376
MES_IDNA_3040_R1.tsv	0	0	0.159716	0	0	0.159716
MES_IDNA_3040_R2.tsv	0.0221515	0.252924	0.252255	0	0	0.527331
MES_IDNA_5060_R1.tsv	0	0.107295	0.206535	0	0	0.313829
MES_IDNA_5060_R2.tsv	0	0.187017	0	0.0492511	0	0.236268
NOA_IDNA_01_R1.tsv	0	0.0171152	0	0	0	0.0171152
NOA_IDNA_01_R2.tsv	0	0.0240185	0.0161162	0.010408	0	0.0505428
NOA_IDNA_1020_R1.tsv	0.0497976	0.0630631	0	0	0	0.112861
NOA_IDNA_1020_R2.tsv	0	0.126406	0	0	0	0.126406
NOA_IDNA_3040_R1.tsv	0	0.445494	0.818927	0	0	1.26442
NOA_IDNA_3040_R2.tsv	0	0.375216	0.203859	0	0	0.579075
NOA_IDNA_5060_R1.tsv	0	0.0547528	0	0.0269853	0	0.0817381
NOA_IDNA_5060_R2.tsv	0	0.208898	0.130461	0	0	0.339359
NOA_IDNA_510_R1.tsv	0	0	0	0	0	0
NOA_IDNA_510_R2.tsv	0.00431498	0.0322168	0.00821115	0.0159175	0	0.0606604
YUN_IDNA_01_R1.tsv	0	0.372041	0.134581	0	0	0.506623
YUN_IDNA_1020_R1.tsv	0	0.0530698	0.0177371	0	0.031784	0.102591
YUN_IDNA_1020_R2.tsv	0	0.0696331	0.0629857	0	0.0300192	0.162638
YUN_IDNA_3040_R1.tsv	0	0.296256	0.0419967	0	0	0.338253
YUN_IDNA_5060_R2.tsv	0	0.1031	0.0712157	0	0	0.174316
YUN_IDNA_510_R2.tsv	0	0.170689	0.309512	0	0	0.4802

## Sheet: PsbA
file_id	Chloroflexota-type	Chloroplast-type	Proteobacteria-type	Cyanobacteria-type	Gemmatimonadota-type	SUM
TAL_IDNA_01_R1.tsv	0.0130097	0.00793677	0.214721	0	0	0.235667
TAL_IDNA_01_R2.tsv	0.00871822	0	0.382198	0	0	0.390916
TAL_IDNA_1020_R1.tsv	0.00695226	0.025892	0.403808	0.0490928	0	0.485745
TAL_IDNA_1020_R2.tsv	0	0	0.339272	0.0607345	0.0146023	0.414609
TAL_IDNA_3040_R1.tsv	0.0497788	0.349237	0.380901	0.610812	0	1.39073
TAL_IDNA_3040_R2.tsv	0.0134557	0.0471739	0.196917	0.167865	0	0.425411
TAL_IDNA_5060_R1.tsv	0	0	0.223282	0.0294303	0	0.252713
TAL_IDNA_5060_R2.tsv	0	0.0973219	0.365119	0.165775	0.0132857	0.641502
TAL_IDNA_510_R1.tsv	0.039927	0.0213111	0.13674	0.0865296	0	0.284508
TAL_IDNA_510_R2.tsv	0	0.0147077	0.222044	0.118847	0	0.355599
DGA_IDNA_01_R1.tsv	0.143664	0.0100055	0.335144	0.00994173	0.00956112	0.508317
DGA_IDNA_01_R2.tsv	0.0563353	0.0941631	0.360793	0.00910973	0	0.520401
DGA_IDNA_1020_R1.tsv	0	0.119599	0.234067	0.209952	0.00836619	0.571985
DGA_IDNA_1020_R2.tsv	0.026003	0	0.304415	0.0514367	0	0.381855
DGA_IDNA_3040_R1.tsv	0.0203365	0	0	0	0	0.0203365
DGA_IDNA_3040_R2.tsv	0	2.0718	3.45241	3.18726	0	8.71147
DGA_IDNA_5060_R1.tsv	0	0	0.832628	0	0	0.832628
DGA_IDNA_510_R1.tsv	0	0.0172061	0.336345	0.0430152	0	0.396566
DGA_IDNA_510_R2.tsv	0	0.0795595	0.286328	0.141553	0	0.507441
MES_IDNA_01_R2.tsv	0	0	0.132899	0	0	0.132899
MES_IDNA_1020_R1.tsv	0	0	0.161967	0	0	0.161967
MES_IDNA_1020_R2.tsv	0	0	0.313939	0.0362695	0	0.350209
MES_IDNA_3040_R1.tsv	0.605436	0	0	0.0988782	0	0.704314
MES_IDNA_3040_R2.tsv	0	0.311984	0.0944352	0.0441097	0	0.450529
MES_IDNA_5060_R1.tsv	0	0.67371	0.0543664	2.23544	0	2.96352
MES_IDNA_5060_R2.tsv	0	0.0790246	0.557452	0.185113	0	0.821589
MES_IDNA_510_R1.tsv	0	7.79405	6.18622	6.9649	0	20.9452
MES_IDNA_510_R2.tsv	0	0.0193159	0.12622	0	0	0.145535
NOA_IDNA_01_R1.tsv	0	0.379263	0.290057	0.466713	0.0349642	1.171
NOA_IDNA_01_R2.tsv	0.0188477	0	0.0915438	0.0168487	0	0.12724
NOA_IDNA_1020_R1.tsv	0.0369743	0	0.0715241	0	0	0.108498
NOA_IDNA_1020_R2.tsv	0	0	1.96874	0	0	1.96874
NOA_IDNA_3040_R1.tsv	0.347202	0	6.28831	0	0.14901	6.78453
NOA_IDNA_3040_R2.tsv	0	0	0.625114	0.264625	0	0.889739
NOA_IDNA_5060_R1.tsv	0.0570118	0.0999377	0.553829	0.478239	0	1.18902
NOA_IDNA_5060_R2.tsv	0	0.549232	0	0.514493	0	1.06373
NOA_IDNA_510_R1.tsv	0	0	0	0	0	0
NOA_IDNA_510_R2.tsv	0.0098662	0.0602645	0.311994	0.210342	0	0.592467
YUN_IDNA_01_R1.tsv	0	0.14461	0.613856	0	0	0.758467
YUN_IDNA_1020_R1.tsv	0.0207829	0	0.655119	0.0371574	0	0.713059
YUN_IDNA_1020_R2.tsv	0.0654298	0.258595	0.157032	0.552202	0	1.03326
YUN_IDNA_3040_R1.tsv	0	0.721885	0.191253	1.49215	0	2.40528
YUN_IDNA_5060_R1.tsv	0	0	0.375819	0	0	0.375819
YUN_IDNA_5060_R2.tsv	0	0.148246	0.319478	0	0	0.467724
YUN_IDNA_510_R1.tsv	0	0.354449	0	0	0	0.354449
YUN_IDNA_510_R2.tsv	0	0.172877	0.383216	0	0	0.556092

[truncated: 16 more sheets: RHO, RbcL, Mcr, HbsT, HbsC, AcsB, AclB, NiFe, AtpA, CcoN, CoxA, CydA, CyoA, NuoF, SdhA, FrdA]
