# Supplementary material for: Atmospheric chemosynthesis may enable colonization of the driest place on Earth
Source: Research Square preprint supplement (doi:10.21203/rs.3.rs-5241557/v1), 2024-11-11
Supplement: Supplementary file 2 [file 38bf3e93f6e3537f0cee2ccd.xlsx]

## Sheet: data_every_sample
					Carbon			Anions and cations								Soil grain texture							Gas
Site	Depth	Sample Year	pH	EC	SOC	d13C	carbonate	Na	K	Mg2	Ca2	Cl_ion	nitrate	phosphate	sulfate	clay	fine_silt	medium_silt	coarse_silt	fine_sand	medium_sand	coarse_sand	H2_ppm	CH4_ppm
DGA	0-1	2022	7.97	3030	8.5275	-28.145	0.867708	464.04	98.04	99.22	3194.05	1122.82	112.25	0	8073.29	8.91667	10.1833	7.935	11.8	35.0333	22.7167	3.38167	6.08698	2.87046
DGA	5-10	2022	8.2	2580	1.895	-25.1325	0.00359747	197.595	45.53	107.215	3065.86	522.655	37.555	0	7731.29	5.93167	6.34167	5.83	9.655	31.3833	34.8	6.05833	3.84872	2.63953
DGA	10-20	2022	8.21	1665	2.66115	-24.6521	0.00299176	116.32	33.01	59.975	1793.27	323.795	22.575	0	4791.79	3.505	5.465	3.07333	6.92667	37.65	39.3333	4.02217	5.73676	3.57188
DGA	30-40	2022	7.66	2270			4.648	348.88	44.54	98.885	2969.03	1247.64	94.42	0	6434.41	2.37333	3.47	1.84	7.82	34.45	41.6167	8.41
DGA	50-60	2022	8	3210	2.25687	-23.9496	0.00301288	509.385	45.78	139.695	3277.35	1778.07	131.36	0	7709.27	3.15	5.77167	5.56833	9.08667	30.7833	38.15	7.47667	4.11021	3.81504
DGA 1	0-1	2016	8.9	1535	5.08155	-28.0338	2.13715	591.225	83.675	36.725	2369.23	563.775	0	27.075	3235.98	4.014	6.64	5.646	11.86	35.64	29.68	6.544	5.59018	2.40813
DGA 1	5-10	2016	8.33	2580	4.87883	-29.3174	2.39789	311.975	81	97.825	4184.65	521.65	84.7	0	7219.4	7.405	7.15333	3.10333	4.2	23.8333	40.75	13.55	6.08698	2.87046
DGA 1	10-20	2016	8.47	2380	7.99274	-30.6999	2.59107	128.175	42.975	69.3	3975.77	435.55	66.925	0	7187.12	3.73	5.79333	2.79833	3.88667	24.35	49.7667	9.66333	3.84872	2.63953
DGA 1	30-40	2016	8.37	2720	1.14	-28.031	0.01	0	18.9	17.4	751.125	1146.77	0	0	1365.07
DGA 1	50-60	2016	8.37	2720	1.13952	-28.0315	1.49529	0	18.9	17.4	751.125	1146.77	0	0	1365.07								5.73676	3.57188
DGA 2	0-1	2016	8.97	1530	15.1413	-34.8368	1.94507	514.975	78.525	31.275	2150.93	423.975	0	0	3167.6	3.42833	5.60667	4.185	12.7333	37.8333	29.1833	7	4.11021	3.81504
DGA 2	5-10	2016	8.29	2410	4.31998	-28.7609	2.62161	178.575	72.15	66.5	4145.55	212.95	70.875	0	7258.78	7.795	13.0833	17.6333	7.59	15.9333	31.1833	6.76667	5.59018	2.40813
DGA 2	10-20	2016	8.42	2840	3.89528	-27.6332	3.13959	424.325	59.225	132.25	4353.07	865	121.65	0	7467.42	4.625	10.0183	22.15	21.8667	2.09667	24.4	14.8667	6.08698	2.87046
DGA 2	30-40	2016	8.45	2600	1.604	-29.164	2.54	310.8	63.68	76.78	4180.33	547.5	70.58	0	7215.6
DGA 2	50-60	2016	8.45	2600	1.60435	-29.1635	2.53582	310.8	63.675	76.775	4180.33	547.5	70.575	0	7215.6								3.84872	2.63953
DGA 3	0-1	2016	8.73	1024	6.16356	-27.5491	1.65819	290.225	78.8	43.1	1805.88	274.625	63.7	0	2000.83	4.77	7.73	5.56	13.52	40.2	21.8	2.79	5.73676	3.57188
DGA 3	5-10	2016	8.33	2930	10.2923	-32.2124	3.15785	417	61.45	131.85	4377.23	1017.05	145.325	0	7443.62								4.11021	3.81504
DGA 3	10-20	2016	8.44	2360	2.65409	-26.58	1.71705	544.325	54.85	60.7	4228.97	310.325	64.45	43.1	7333.18								5.59018	2.40813
TAL	0-1	2022	8.68	20.3	1.92166	-25.1743	0	20.38	6.07	0	9.41	7.6	4.45	1.5	21.61	2.08333	5.34833	3.48	5.90667	23.55	41.1167	18.5	10.9404	3.76747
TAL	5-10	2022	9.53	40.3	2.0228	-27.3851	0	33.005	9.815	0	4.535	6.28	4.095	1.1	11.455	4.88333	8.83667	7	7.00167	19.3667	35.15	17.7667	10.2674	3.48358
TAL	10-20	2022	9.62	22.8	1.74613	-26.856	0.00021043	20.115	4.89	0	2.94	3.05	1.425	2.05	4.17	5.655	7.355	5.54	6.99	13.9667	38.45	22.0667	8.05727	2.12076
TAL	30-40	2022	9.12	128.7			2.258	115.86	31.7	0	12.465	18.08	10.08	0.665	49.405	4.75167	6.54667	4.33	6.63	13.5833	30.9333	33.2333
TAL	50-60	2022	7.97	2320	2.33451	-23.885	0.000418167	90.71	85.825	66370	2836.88	80.555	35.745	0.255	7898.09	4.76	9.76167	9.43833	6.32667	8.34	33.0667	28.3	11.1826	5.47695
TAL 1	0-1	2016	8.23	306	3.38586	-29.3091	0.0851422	320.74	11.355	3.005	13.175	425.255	4.86	2.405	105.27	1.86667	4.37833	3.24833	7.025	16.2333	39.2667	27.9667	10.5463	5.45311
TAL 1	5-10	2016	8.9	24.2	2.52589	-30.9982	0.0842941	16.13	6.185	4.415	20.725	6.545	2.065	1.165	4.705	2.35167	5.13167	3.09	3.84167	16.8833	41.9	26.8167	10.9404	3.76747
TAL 1	10-20	2016	8.93	19.6	2.77922	-30.2984	0.101965	13.845	5.31	3.055	14.95	3.89	3.745	1.645	6.365	2.97167	7.15	4.16	3.99167	8.59333	32.1333	41.0167	10.2674	3.48358
TAL 1	30-40	2016	9.42	51.3	4.823	-30.634	0	41.74	13.25	3.42	16.35	4.78	3.43	1.33	20.9
TAL 1	50-60	2016	9.52	50.5	2.32404	-30.2048	0.0426797	51.99	13.265	2.97	13.46	11.64	7.15	1.535	9.825	3.6	5.806	2.71333	3.33	11.1817	42.1333	31.2167	8.05727	2.12076
TAL 2	0-1	2016	7.81	237	2.93075	-30.0131	0.0170829	216.58	10.905	3.73	15.855	295.03	5.745	2.25	70.55	1.515	3.65	2.145	4.54167	10.9533	37.6667	39.5333	11.1826	5.47695
TAL 2	5-10	2016	8.8	22.5	1.80875	-31.4187	0.0327672	17.105	4.405	2.95	15.08	8.5	2.245	1.695	4.575	2.68	5.23	7.28833	9.81667	19.8333	36.1	19.0333	10.5463	5.45311
TAL 2	10-20	2016	9.16	21.6	3.38682	-31.2374	0.0588336	17.84	4.5	2.82	15.505	2.865	2.855	3.565	5.15	4.20833	7.63833	9.25667	10.67	13.0017	32.45	22.7667	10.9404	3.76747
TAL 2	30-40	2016	9.25	56.9	4.707	-30.643	0	46.64	11.25	2.89	15.38	12	12.52	1.62	31.67
TAL 2	50-60	2016	9.53	96.9	3.14053	-27.7328	0.0587162	89.66	15.615	3.61	15.155	14.37	10.81	0.915	57.585	5.125	7.00667	3.00667	4.01167	16.3667	46.1667	18.3	10.2674	3.48358
TAL 3	0-1	2016	8.1	169.1	3.32569	-29.778	0.107487	154.205	7.165	2.585	13.12	190.145	4.82	3.445	51.145								10.9404	3.76747
TAL 3	5-10	2016	8.81	21.7	2.57974	-31.9024	0.0410155	16.885	4.99	3.48	14.175	6.16	3.54	1.545	6.665								10.2674	3.48358
TAL 3	10-20	2016	8.85	491	3.8033	-30.575	0.0836782	454.715	27.135	2.31	14.03	456.11	36.05	7.97	322.085								8.05727	2.12076
TAL 3	30-40	2016	8.37	3880	4.966	-28.873	0	1811.73	127.2	132.69	3896.01	1774.2	443	0	9085.76
TAL 3	50-60	2016	8.49	2270	2.86277	-31.7465	0.0415886	2058.45	83.07	58.795	80.93	2026.3	1035.67	0	910.12								11.1826	5.47695
YUN	0-1	2022	7.63	2690	2.0223	-24.3112	1.34	295.035	67.905	89940	3161.6	118.435	367.19	0.49	8779.23	5.125	7.00667	3.00667	4.01167	16.3667	46.1667	18.3	13.5392	6.94056
YUN	5-10	2022	7.9	2590	0.72225	-27.6861	1.28	365.32	45.265	103.535	2894.79	129.68	158.725	0	8382.44	8.465	18.0167	28.35	12.6667	11.2833	15.1167	6.06833	11.7926	11.4823
YUN	10-20	2022	8.76	6400	0.1348	-27.6122	0.000320221	4898.07	214.055	388.98	2954.06	2347.3	998.825	0	16286.2	0.628	1.008	4.642	17.74	67.88	8.078	0.0124	7.81041	4.84729
YUN	30-40	2022	8.36	11310			0.216	8607.7	438.48	364.38	3851.78	8765.98	2673.27	0	14669.7
YUN	50-60	2022	8.56	32000	0.1573	-27.8107	0.000124948	47571.1	866.365	1015.65	3169.43	10026.7	2822.64	5.285	102118	0.118333	0.06455	0.916667	8.65833	83.2333	6.99167	0	18.1349	7.91948
YUN 1	0-1	2016	7.56	2700	5.66049	-28.6919	0.170067	352.515	100.725	112.515	4194.5	122.58	269.56	1.205	8490	14.3333	15.9833	14.3833	15.85	8.87167	17.2333	13.3667	14.0041	7.61649
YUN 1	5-10	2016	8.17	3240	2.55592	-30.3534	0.211098	1225	60.36	85.83	3930.75	478.18	491.18	0	8817	12.65	19.1667	31.4333	12.65	8.12667	13.1	2.88	13.5392	6.94056
YUN 1	10-20	2016	8.02				0.336078									3.14833	15.8667	16.3667	22.4167	38.1	4.00667	0.094	11.7926	11.4823
YUN 1	30-40	2016	7.71	4310	2.095	-30.916	0.04	52.75	17.5	26	4073.5	2025	26.5	0	7440.25
YUN 1	50-60	2016	7.91	7570	2.84045	-23.9136	0	6382	221.5	208.5	4774.25	5109.25	1463.25	0	15220.5	13.35	31.4	30.15	6.86833	2.55833	10.7667	4.93333	7.81041	4.84729
YUN 2	0-1	2016	7.22	2630	4.45778	-26.1147	0.350873	283.03	91.225	120.88	4186.5	51.825	180.485	1.545	8442	17.3	16.73	17.235	16.615	13.2	12.15	6.74	18.1349	7.91948
YUN 2	5-10	2016	8.11	2620	2.19201	-27.3249	0.712812	461.41	42.085	82.965	4053.75	93.555	171.64	0	8390.25	0.406667	0.368333	2.78667	7.28667	85.2	3.96167	0	14.0041	7.61649
YUN 2	10-20	2016	8.01	2310	1.59055	-29.3433	0.280064	124.005	0	0	3906.75	183.5	26.51	0	7056	3.61333	11.2	20.15	20.3167	30	10.29	4.42167	13.5392	6.94056
YUN 2	30-40	2016	7.93	2520	1.645	-28.422	0.13	237.41	109.3	63.4	4000	219.3	141.68	0	7732.25
YUN 2	50-60	2016	8.4	8810	2.03671	-28.1271	0	9208.5	175.5	99	3993.5	3919	599.25	0	20859	3.69333	5.26667	16.1017	17.7017	42.6667	10.95	3.63833	13.5392	6.94056
YUN 3	0-1	2016	7.53	2650	6.01193	-28.2358	0.575906	323.6	96.51	129.13	4119	73.32	251.49	1.71	8447.25	15.315	14.83	14.815	15.915	12.75	10.945	15.385	11.7926	11.4823
YUN 3	5-10	2016	8.11	2730	1.79706	-29.1858	0.787336	573.765	40.935	72.23	3963.5	236.825	244.495	0	8157.5								7.81041	4.84729
YUN 3	10-20	2016	8.05	2400	1.57801	-30.9671	0.392093	188.755	8.35	22745	4003.75	99.975	81.18	0	7546								18.1349	7.91948
YUN 3	30-40	2016	8.01	2430	2.212	-29.331	0.02	96.75	26.75	37.75	4059.5	128	58.75	0	7647.5
YUN 3	50-60	2016	7.68	5170	2.23385	-26.3963	0.0409745	2377.75	88.25	258	5168	2905.75	1108.75	0	11451.2								14.0041	7.61649
NOA	0-1	2022	7.66	3060	2.18298		0.14657	194.215	131.835	119.03	3864.55	50.455	198.7	0.225	10694.5	7.07167	9.16333	13.7667	13.5833	11.4667	32.6	12.3333	14.2699	10.9876
NOA	5-10	2022	8.11	2490	2.23149		0.185214	144.335	64.965	83435	2997.49	52.25	157.45	0.28	8425.23	6.28667	17.6667	21.6833	5.58833	10.7633	29.7667	8.22167	16.3159	6.12793
NOA-1	0-1	2016	7.47	3010	0.651704	-28.4371	0.17102	265.63	133.1	157.54	5111.73	34.465	100.725	1.88	10597.8	12.4833	13.05	13.3833	11.0167	8.80333	30.2333	11	14.4265	6.39759
NOA-1	5-10	2016	8.07	2990	7.54445	-29.8297	0.0855964	201.47	52.805	42.615	4243.19	82.4	446.29	0	7644.98	0.165	0.371667	1.70833	8.66667	82.4667	6.62333	0	12.2175	6.73771
NOA-1	10-20	2016	8.03	2320	1.90111	-29.9163	0.0412192	83.4	105.52	47.72	4144.26	25.195	41.955	0	7572.2	0.3	0.355	1.39833	7.755	84.5167	5.67833	0	14.5032	7.77099
NOA-1	30-40	2016	8.08	5290	1.54	-29.259	0.08	3671.3	380.3	111.8	4429	1909	355.5	0	14048.8
NOA-1	50-60	2016	8.63	2630	0.945986	-27.242	0.00849116	37663.4	838.965	1395.48	3410.22	1995.97	3349.49	0	84125	4.62	10.135	23.9833	19.4833	3.59833	30.4333	7.775	14.2699	10.9876
NOA-2	0-1	2016	7.19	2930	3.61136	-30.5157	0.167813	140	124.5	258.75	4749.5	64.5	62	0	10283.8	11.8	12.7833	12.7833	9.555	9.18167	30.2167	13.7167	16.3159	6.12793
NOA-2	5-10	2016	8.16	2840	2.71746	-29.3517	0.19	126.98	50.725	37.49	3317.8	58.425	277.46	0	7368.15	12.45	12.1333	9.34333	6.39833	7.175	29.5	22.9667	14.4265	6.39759
NOA-2	10-20	2016	8.13	2320	2.06005	-27.9753	0.151843	89.505	83.65	42.97	4225.43	52.955	82.67	0	7712.22	0.288333	0.348333	1.54833	8.28167	82.3167	7.20167	0	12.2175	6.73771
NOA-2	30-40	2016	7.88	3150	1.65	-27.85	0.04	610.98	122.9	124.9	4742.85	424.04	227.82	0	9855.25
NOA-2	50-60	2016	8.23	10370	1.27697	-27.8746	0.0252176	10265.8	740	433.5	4579.75	3867.75	3855.25	0	23977	7.03	12.9	22.3167	17.1167	9.07	27.85	3.74833	14.5032	7.77099
NOA-3	0-1	2016	7.38	3050	3.42879	-29.8638	0.194147	210.45	144.985	152.315	5445.34	25.91	137.97	0.9	11222								14.2699	10.9876
NOA-3	5-10	2016	8.02	2610	2.65643	-28.4335	0.325945	300.895	57.65	49.32	4260.15	138.71	808.225	0	7625.78								16.3159	6.12793
NOA-3	10-20	2016	8.7	8250	1.66314	-28.3331	0.0841851	8331.5	236.5	122	3388.75	1040.5	2233.75	0	20566.8								14.4265	6.39759
NOA-3	30-40	2016	8.28	9250	1.52	-28.08	0.06	7498.8	424.3	126	5319.25	4982.75	5026.25	0	16125	8.64667	11.2783	10.7933	10.725	14.8333	35.4	8.345
NOA-3	50-60	2016	8.54	8690	0.878377	-30.0676	0.0166809	6132.25	1110.75	1503.5	6796.25	3678.5	5414	0	17189.2								12.2175	6.73771
MES1	0-1	2022	7.93	890	0.027	-28.71	0.219716	46.06	56.125	25.22	875.35	4.335	18.03	1.165	2539.18	4.825	6.34333	5.05	8.24833	22.85	36.1833	16.5167	14.5032	7.77099
MES1	5-10	2022	8.23	2910	1.0259	-29.8	0.620454	273.165	69.88	53200	3694.91	50.16	354.725	0	10136.5	7.82333	14	13.0167	9.13833	11.0833	26.1	18.8167
MES1	10-20	2022	8.68	4700	1.06386	-27.58	0.0831046	2571.68	313.495	106.18	3444.2	687.025	1848.71	0	13104.7	6.895	13.6667	13.4833	8.90833	11.55	28.7	16.7833
MES1	30-40	2022	7.99	22900	1.1993		0.03	29370	1636.19	608.715	2634.93	2061.68	7253.74	10	70442.3	7.03667	13.4833	13.2333	0.801833	16.3833	25.2333	16.5833
MES1	50-60	2022	8.33	50100	0.3689		0	79285.9	4887.18	1962.47	2972.11	2224.8	8388.63	9.415	188964	7.89833	16.05	22.2167	11.95	15.35	20.0333	6.53
MES2	0-1	2022	7.8	916	11.91	-27.76	1.74	51.31	70.265	35.39	796.435	3.39	18.285	0.605	2321.07	7.01667	8.94167	11.1667	17.8667	15.85	24.45	14.6833
MES2	5-10	2022	7.67	2112	12.61	-27.37	0.6	196.35	42.125	30.025	2417.45	8.055	54.34	0	7328.5	4.83333	6.485	6.81333	11.8833	19.5833	34.1833	16.25
MES2	10-20	2022	7.29	2464	11.86	-27.58	0.78	173.765	122.915	41.42	2956.11	30.215	158.16	0	8789.08	7.62167	9.305	8.31	12.1833	17.55	29.2667	15.7667
MES2	30-40	2022	7.72	2410	11.8555		0.43	1112.46	190.595	34.1	3477.16	753.785	411.5	0	9681.62	4.625	7.885	5.67333	8.815	19.8333	23.9	29.2667
MES2	50-60	2022	8.55	12220	4.88334		0.22	12044.1	957.205	57.81	4057.43	5155.55	9497.39	0	22928.8	5.74333	10.64	23.7333	18.8167	10.5	20.7667	9.76333
MES3	0-1	2022	7.38	2430	6.88518	-28.235	0.31	50.565	100.98	65.3	3054.49	5.42	34.455	0.39	8899.17	6.94833	8.48833	7.80333	10.85	19.5167	31.9833	14.4
MES3	5-10	2022	7.43	2862	20.2973	-29.5935	0.58	439.41	36.075	36.04	3361.47	42.295	375.09	0	10164	5.22333	12.5333	14.1833	5.115	15.4167	33.7333	13.8167
MES3	10-20	2022	7.69	3410	1.79018	-27.58	0.02	958.925	259.7	69.46	3341.17	155.705	202.805	0	12038.8	3.15	6.61333	22.9	31.2167	12.1933	14.5	9.40667
MES3	30-40	2022	8.46	12660	0.7596		0.01	13670.4	1391.96	174.37	2521.39	1085.14	2749.09	2.51	34072.9	6.35167	12.35	20.9667	14.9667	13.3	22.2167	9.85667
MES3	50-60	2022	8.18	26210	1.41696		0	36189	2752.23	1414.24	3008.78	2207.94	8795.47	0	91088.4	5.14333	7.39333	9.47	19.7667	21.3833	24.9833	11.8833
